# Supplementary material for: Prebiotic access to enantioenriched glyceraldehyde mediated by peptides
Source: Royal Society of Chemistry journal article supplement (doi:10.1039/d1sc01250a), 2021-01-01

Supporting information of

**Prebiotic Access to Enantioenriched Glyceraldehyde  
Controlled by Peptides**

**Jinhan Yu, Alexander X. Jones, Luca Legnani and Donna G. Blackmond**

*Department of Chemistry Scripps Research, La Jolla CA 92037 USA*

## Table of content

|                                                                                                                                                            |    |
|------------------------------------------------------------------------------------------------------------------------------------------------------------|----|
| Table of content .....                                                                                                                                     | 2  |
| 1. General information .....                                                                                                                               | 3  |
| 2. General procedures of kinetic resolution of <i>rac</i> -glyceraldehyde by peptides .....                                                                | 4  |
| <i>Resolution of rac-glyceraldehyde by peptides</i> .....                                                                                                  | 4  |
| <i>Measurement of concentration of remaining glyceraldehyde</i> .....                                                                                      | 4  |
| <i>Measurement of enantiomeric excess of remaining glyceraldehyde</i> .....                                                                                | 5  |
| <i>Measurement of concentration of DHA</i> .....                                                                                                           | 6  |
| <i>Calculation of selectivity factor</i> .....                                                                                                             | 7  |
| 3. Measurement of glyceraldehyde concentrations and ee's from kinetic resolution .....                                                                     | 8  |
| 3.1 <i>L</i> -Dipeptide-mediated kinetic resolution of <i>rac</i> -glyceraldehyde .....                                                                    | 8  |
| 3.2 Ratios of <i>LL</i> -PV to <i>rac</i> -glyceraldehyde .....                                                                                            | 9  |
| 3.3 <i>L</i> -Prolinamide and <i>N</i> -terminal <i>L</i> -Proline tri- and tetra- peptide-mediated kinetic resolution of <i>rac</i> -glyceraldehyde ..... | 9  |
| 3.4 Comparison of Homo- and Hetero-chiral Peptides .....                                                                                                   | 10 |
| 4. Mechanistic studies .....                                                                                                                               | 11 |
| 4.1 Monitoring the kinetic profile using <sup>13</sup> C-labeled material .....                                                                            | 11 |
| 4.2 Independent Reactions with <i>D</i> - and <i>L</i> -glyceraldehyde .....                                                                               | 12 |
| 4.2.1 Reaction protocol .....                                                                                                                              | 12 |
| 4.2.2 Measurement of concentrations of glyceraldehyde and DHA .....                                                                                        | 12 |
| 4.2.3 Estimation of ARP Concentration in Independent <i>D</i> -/ <i>L</i> -Glyceraldehyde Reactions .....                                                  | 13 |
| 4.2.4 Determination of Mass Balance .....                                                                                                                  | 14 |
| 4.3 Control experiment with <i>DD</i> -PV .....                                                                                                            | 15 |
| 5. Solid Phase enrichment of <i>LL</i> -PV from <i>LL</i> / <i>DL</i> -PV mixtures .....                                                                   | 16 |
| <i>Measurement of saturation concentration of LL-PV and DL-PV</i> .....                                                                                    | 16 |
| <i>Solid phase enrichment of LL-PV</i> .....                                                                                                               | 16 |
| 6. Characterization of Amadori Rearrangement Product .....                                                                                                 | 18 |
| 7. Preparation of peptides .....                                                                                                                           | 23 |
| 7.1 Synthesis of peptides .....                                                                                                                            | 23 |
| 7.2 NMR spectra for new peptides .....                                                                                                                     | 26 |

## 1. General information

**Materials:** Commercial reagents were purchased from Sigma Aldrich, AlfaAesar, Acros, Combi-Block and Oakwood and used as received. Water and acetonitrile for HPLC were purchased from Fischer Scientific.

**Analysis:** NMR spectra were recorded on Bruker, DRX-500 and AMX-400 instruments. Calibration methods of NMR spectra could be found in related sections. The following abbreviations were used to explain multiplicities: s = singlet, d = doublet, t = triplet, q = quartet, m = multiplet, br = broad. High resolution mass spectrometry information was collected on Waters G2-XS time of flight (TOF) mass spectrometry. The aliquots were analyzed by HPLC-MS and SFC. Details could be found in related sections.

## 2. General procedures of kinetic resolution of *rac*-glyceraldehyde by peptides

### *Resolution of rac-glyceraldehyde by peptides*

*Rac*-glyceraldehyde (9.0 mg, 1.0 mmol), *LL*-PV (21.4 mg, 1.0 mmol) and 3,5-*N*-dinitrophenyl-*L*-alanine (DNB-Ala, internal standard, 2~3 mg) were dissolved in 1.0 mL phosphate buffer (4.0 M, pH=9.5). The sample was let to stand at room temperature for 6 hrs.

### *Measurement of concentration of remaining glyceraldehyde*

Aliquots (20  $\mu$ L) were removed from reaction mixture at fixed time points and quenched with 30  $\mu$ L aqueous solution of TFA (TFA/water: 1v/9v). A saturated solution of dinitrophenylhydrazine (DNPH) in ACN (950  $\mu$ L) was added and the samples were let to react at room temperature for 30 minutes. The aliquots were analyzed by LC-MS using a Dionex Ultimate 3000 HPLC system coupled to a Thermo-Fisher MSQ mass spectrometer. HPLC analysis of the DNPH derivatized glyceraldehyde (DNPH-glyc) was performed using Waters Xbridge BEH C18 column (4.6 x 150 mm, 5.0  $\mu$ m) under gradient conditions (1.2 mL/min, 30-70% B, 15 mins; A = H<sub>2</sub>O + 0.1% FA, B = ACN; glyceraldehyde: 3.5 min; DNB-Ala: 5.8 min; UV detection @ 254 nm).

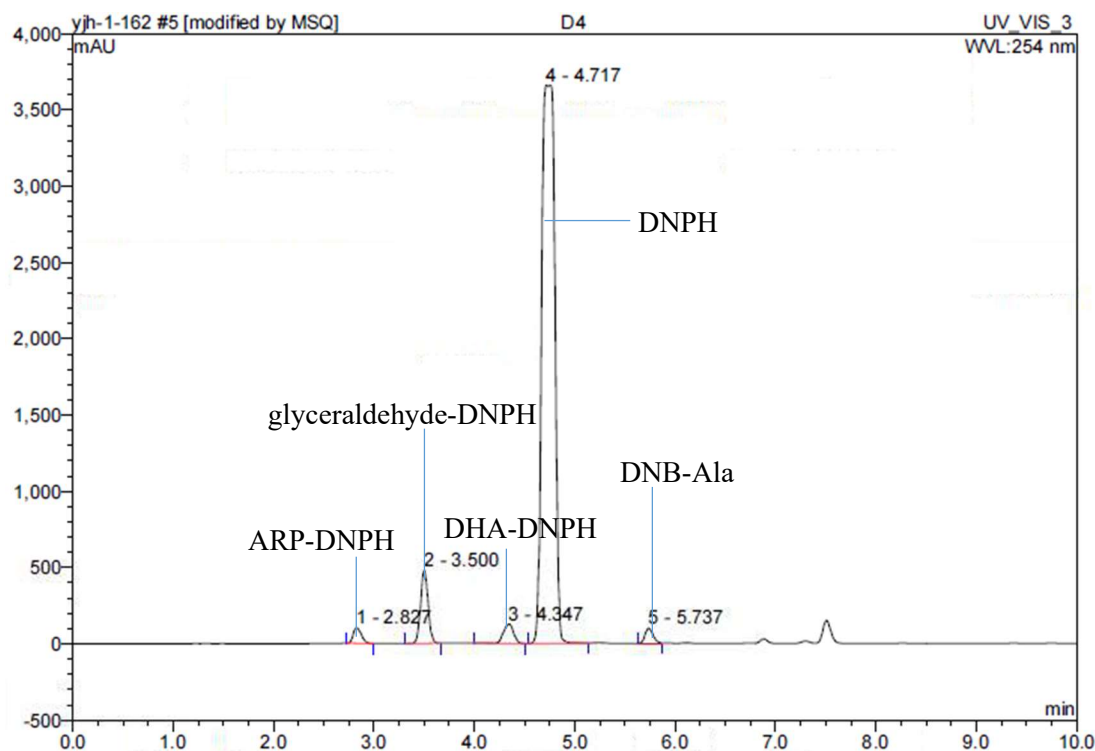

Figure 2. 1 Reaction aliquot sample of kinetic resolution by *LL*-PV and *rac*-glyceraldehyde

| entry | retention time (min) | compound            |
|-------|----------------------|---------------------|
| 1     | 2.827                | ARP-DNPH            |
| 2     | 3.500                | glyceraldehyde-DNPH |
| 3     | 4.347                | DHA-DNPH            |
| 4     | 4.717                | DNPH                |
| 5     | 5.737                | DNB-Ala             |

Compound 1 was identified by MS. Compound 2-5 were identified by comparison of retention time to real samples.

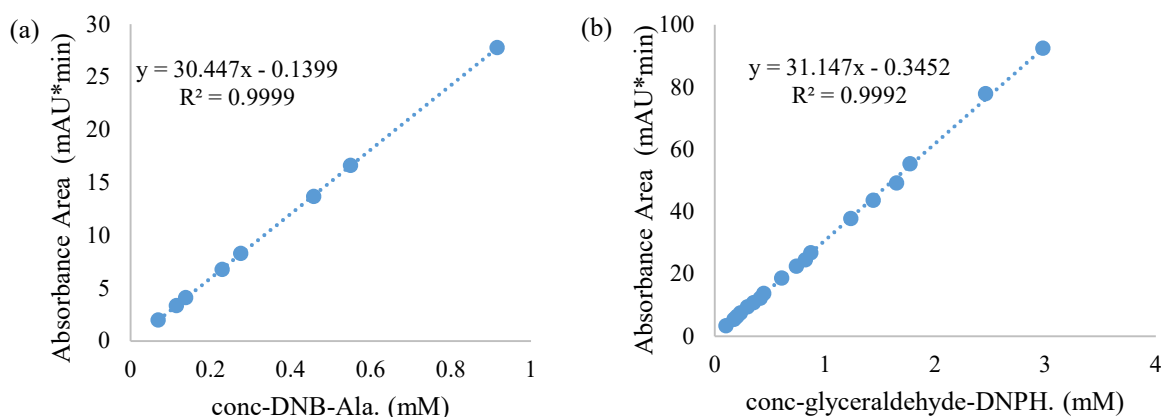

Figure 2. 2 UV calibration curves of DNB-Ala (a) and glyceraldehyde-DNPH (b)

#### Measurement of enantiomeric excess of remaining glyceraldehyde

Aliquots (40  $\mu$ L) were removed from the reaction mixture at fixed time points and quenched with 60  $\mu$ L aqueous solution of TFA (TFA/water: 1v/9v). A saturated solution of DNPH in ACN (250  $\mu$ L) was added and the aliquots were let to react at room temperature for 30 minutes. Chiral SFC analysis of glyceraldehyde-DNPH was performed using a Waters UPC2 SFC with a Daicel IA column (4.6x250 mm, 3  $\mu$ m) under gradient conditions (3 mL/min, 10-60% B over 10 minutes, then hold 60% B; A = CO<sub>2</sub>, B = MeOH containing 0.5% 7N NH<sub>3</sub> in MeOH; 1600 psi backpressure; 30 °C; *L*-glyceraldehyde: 9.93 min; *D*-glyceraldehyde: 13.6 min; UV detection @ 350 nm).

(a)

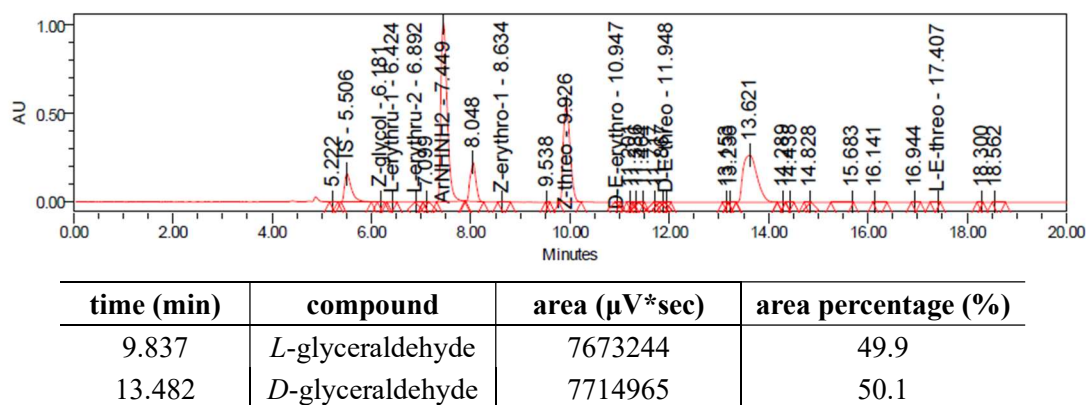

(b)

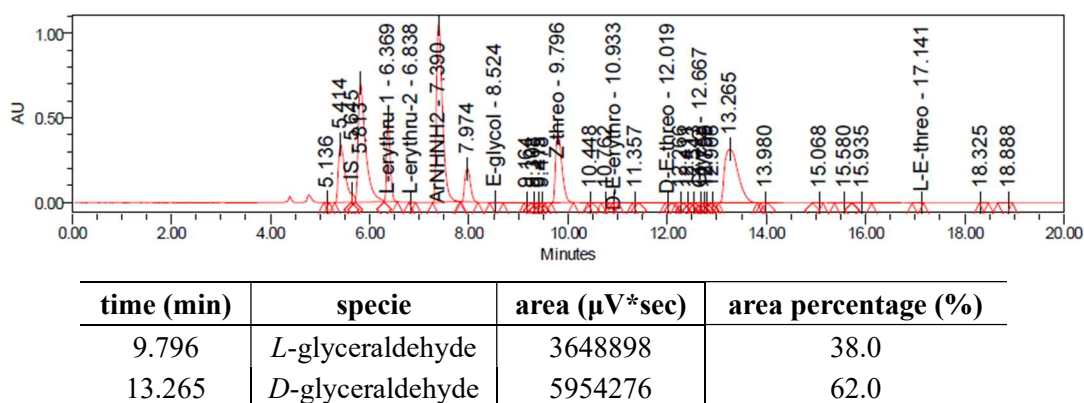

Figure 2. 3 SFC Chromatogram of kinetic resolution of *rac*-glyceraldehyde by *LL*-PV. (a)  $t=0$  hr; (b)  $t=6$  hr

### Measurement of concentration of DHA

Aliquots (20  $\mu$ L) were taken at fixed time points and quenched into 1.0 mL PMP solution. The samples were heated to 55  $^{\circ}$ C for 40 min and submitted to LC-MS analysis. HPLC analysis of the PMP derivatized DHA was performed using Waters Xbridge BEH C18 column (4.6 x 150 mm, 5.0  $\mu$ m) under gradient conditions (1.0 mL/min, 10-60% B, 30 mins; A = H<sub>2</sub>O + 0.1% FA, B = ACN; DHA: 12.3 min; UV detection @ 254 nm).

*PMP solution*: 1-phenyl-3-methyl-5-pyrazolone (PMP) 50 mM in MeOH/borate buffer pH=8.4, 4 M (1v/1v).

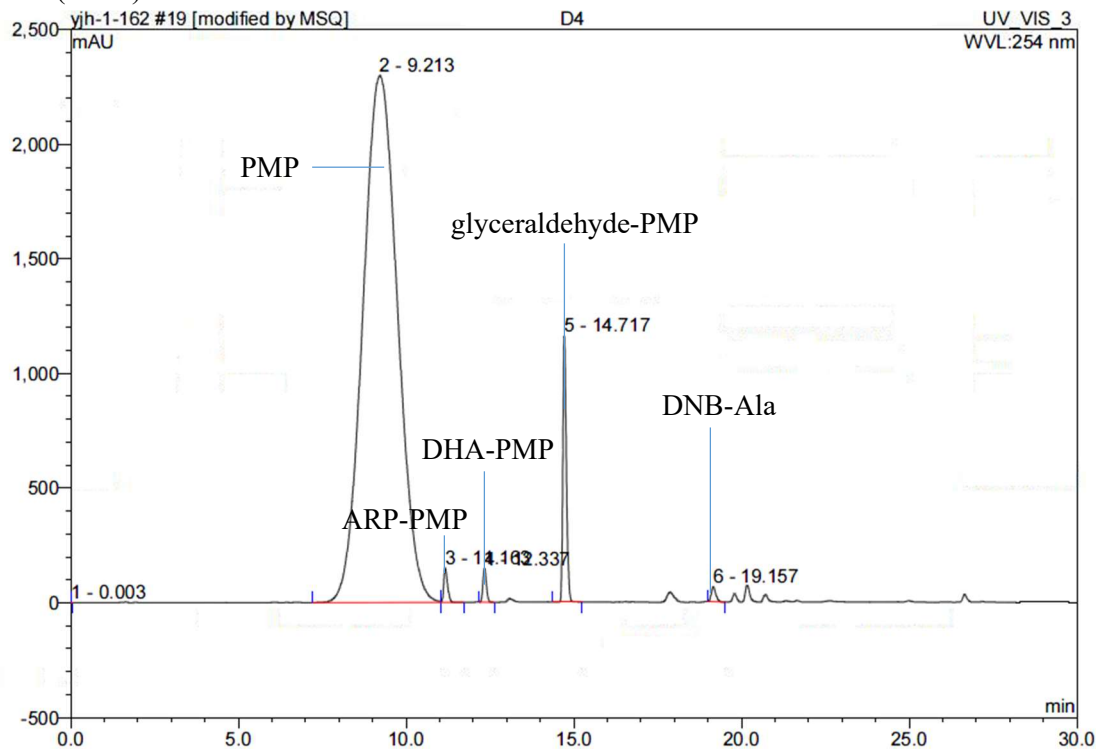

Figure 2. 4 Reaction aliquot sample of kinetic resolution by *LL*-PV and *rac*-glyceraldehyde

| entry | retention time (min) | compound           |
|-------|----------------------|--------------------|
| 1     | 9.217                | PMP                |
| 2     | 11.167               | ARP-PMP            |
| 3     | 12.337               | glyceraldehyde-PMP |
| 4     | 14.727               | DHA-PMP            |
| 5     | 19.157               | DNB-Ala            |

Compound 2 was identified by MS. Compound 1, 3-5 were identified by comparison of retention time to real samples.

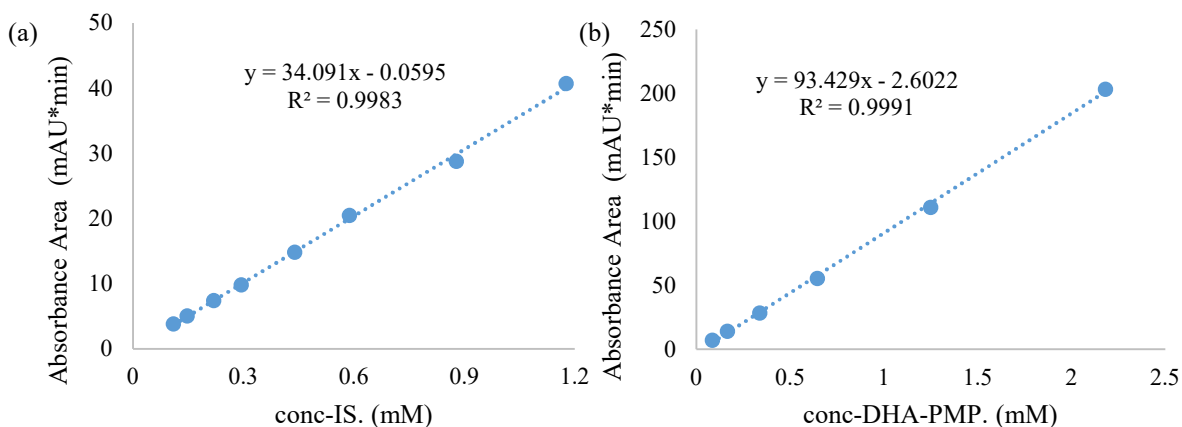

Figure 2. 5 UV calibration curves of DNB-Ala (a) and DHA-PMP (b)

#### Calculation of selectivity factor

In the kinetic resolution of *rac*-glyceraldehyde by *L*-peptides if *L*-glyceraldehyde reacts faster than *D*-glyceraldehyde ( $k_L > k_D$ ):

$$\text{Selectivity factor (s-factor)} = \frac{k_L}{k_D}$$

If first-order kinetics in substrate are assumed, s-factor can be expressed in terms of ee of the recovered starting material and conversion (c):

$$s - \text{factor} = \frac{\log [1 - c(1 + ee)]}{\log [1 - c(1 - ee)]}$$

S-factor of a kinetic resolution was calculated by taking the average of each aliquot.

### 3. Measurement of glyceraldehyde concentrations and ee's from kinetic resolution

#### 3.1 *L*-Dipeptide-mediated kinetic resolution of *rac*-glyceraldehyde

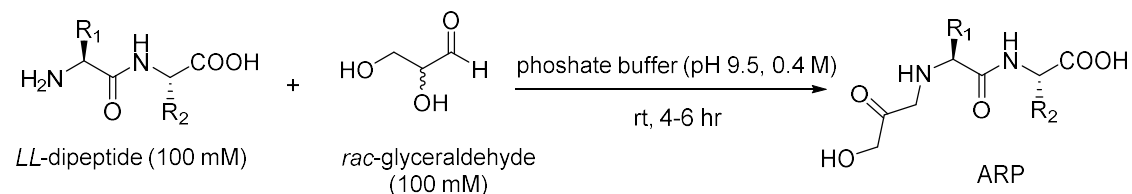

Table 3. 1 screening of different *L*-peptides.

| time (hrs) | <i>LL</i> -PV | <i>LL</i> -PA | <i>LL</i> -PF* | <i>LL</i> -AA |
|------------|---------------|---------------|----------------|---------------|
| 0          | 98.2 (0.3)    | 99.5 (0.2)    | 11.8 (0.1)     | 128.6 (0.1)   |
| 1          | 80.9 (5.9)    |               |                | 76.1 (1.2)    |
| 2          | 69.8 (10.7)   | 87.4 (4.7)    |                | 48.1 (2.9)    |
| 3          | 61.8 (14.6)   |               |                | 29.4 (5.3)    |
| 4          | 54.4 (18.3)   | 74.4 (8.6)    |                | 18.2 (7.1)    |
| 5          | 49.6 (21.3)   |               |                |               |
| 6          | 44.9 (24.1)   | 64.1 (12.4)   | 5.7 (22.0)     |               |

  

| time (hrs) | <i>LL</i> -VL | <i>LL</i> -VV | <i>LL</i> -LV | <i>LL</i> -VD |
|------------|---------------|---------------|---------------|---------------|
| 0          | 98.3 (0.1)    | 97.1 (0.1)    | 92.8 (-0.1)   | 98.4 (0.2)    |
| 2          | 80.9 (-6.4)   | 34.8 (-6.5)   | 36.4 (0.3)    | 41.7 (-5.8)   |
| 4          | 69.8 (-8.7)   | 11.5 (-11.0)  | 14.8 (-2.2)   | 15.5 (-9.6)   |

Time course analysis of glyceraldehyde concentration (mM) and %ee (in parenthesis) in the presence of *LL*-dipeptides. \* *LL*-PF was saturated, the concentration of the peptide was around 10 mM

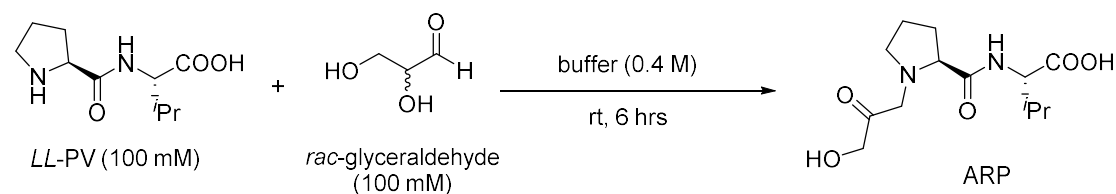

Table 3. 2 The influence of buffer in the kinetic resolution.

| time (hrs) | Carbonate (9.6)* | Borate (8.4) | Acetate (3.8) | Phosphate (7.1) |
|------------|------------------|--------------|---------------|-----------------|
| 0          | 105.7 (0.7)      | 100.1 (0.0)  | 108.1 (--)    | 117.6 (0.0)     |
| 3          | 88.9 (3.2)       | 95.8 (2.4)   | 106.8 (--)    | 72.7 (7.8)      |
| 6          | 72.3 (5.3)       | 93.5 (4.5)   | 108.1 (--)    | 67.3 (13.8)     |

Time course analysis of glyceraldehyde concentration (mM) and %ee (in parenthesis) in the presence of *LL*-PV and different buffers; \*buffer (pH)



### 3.2 Ratios of *LL*-PV to *rac*-glyceraldehyde

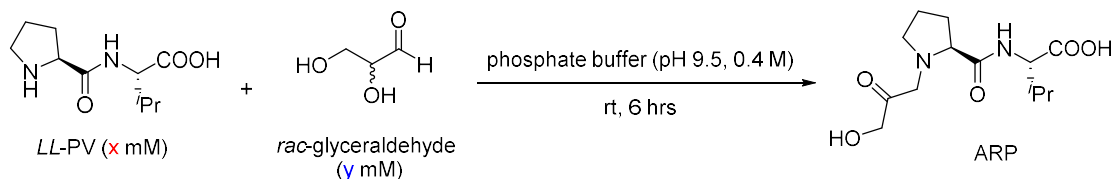

Table 3. 3 The effect of peptide/sugar ratios in the kinetic resolution.

| time (hrs) | 50: 100*    | 100: 50     | 100: 20     | 100:10     |
|------------|-------------|-------------|-------------|------------|
| 0          | 94.0 (0.0)  | 50.1 (0.3)  | 29.1 (0.0)  | 10.7 (0.0) |
| 1          |             |             | 22.2 (11.1) | 7.9 (12.2) |
| 2          | 86.1 (5.1)  | 38.3 (11.2) | 18.2 (18.6) | 6.3 (21.1) |
| 3          |             |             | 14.2 (26.1) | 5.0 (30.3) |
| 4          | 76.0 (8.6)  | 29.8 (20.5) | 12.1 (32.4) | 4.0 (37.5) |
| 5          |             |             | 10.0 (38.9) | 3.2 (44.7) |
| 6          | 65.1 (12.0) | 22.8 (29.4) |             |            |

Time course analysis of glyceraldehyde concentration (mM) and %ee (in parenthesis) for reactions at different initial LL-PV: glyceraldehyde (x:y) ratios; \*peptide conc. (mM): glyceraldehyde conc. (mM)

### 3.3 L-Prolinamide and *N*-terminal *L*-Proline tri- and tetra- peptide-mediated kinetic resolution of *rac*-glyceraldehyde

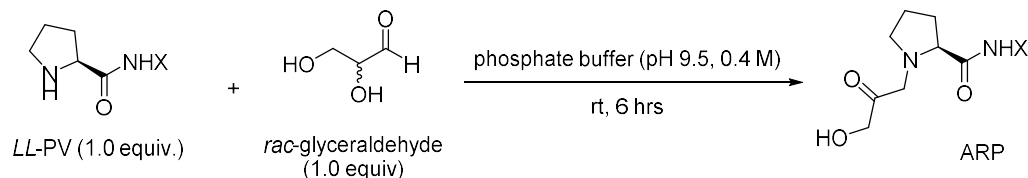

Table 3. 4 The effect of the peptide sequence in the kinetic resolution.

| time (hrs) | <i>L</i> -Pro-NH <sub>2</sub> | <i>LLL</i> -PFV | <i>LLLL</i> -PVVV |
|------------|-------------------------------|-----------------|-------------------|
| 0          | 103 (0.5)                     | 11.6 (0.1)      | 12.0 (0.0)        |
| 6          | 49.6 (13.0)                   | 5.1 (28.1)      | 6.4 (21.0)        |

  

| time (hrs) | <i>LLLL</i> -PVV | <i>LLLL</i> -PVFV | <i>LLLL</i> -PFVV |
|------------|------------------|-------------------|-------------------|
| 0          | 25.3 (0.4)       | 11.8 (0.1)        | 11.9 (0.2)        |
| 6          | 13.8 (22.0)      | 5.7 (22.7)        | 5.4 (30.1)        |

Initial and end point analysis of glyceraldehyde concentration (mM) and %ee (in parenthesis) for reactions with different *N*-terminal-*L*-Proline peptides and *L*-prolinamide.

### 3.4 Comparison of Homo- and Hetero-chiral Peptides

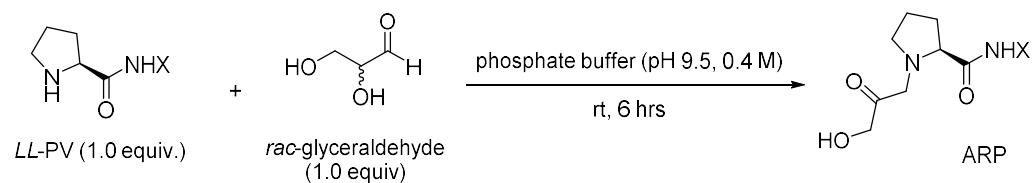

Table 3. 5 Reaction monitoring of proline-based peptides diastereomers.

| time (hrs) | <i>LL</i> -PV-OMe | <i>LD</i> -PV | <i>DL</i> -PV |
|------------|-------------------|---------------|---------------|
| 0          | 105 (0.7)         | 101 (0.3)     | 102 (0.2)     |
| 2          | 75.6 (11.9)       | 84.2 (2.4)    | 96.0 (-1.0)   |
| 4          | 58.8 (19.7)       | 71.0 (4.0)    | 83.9 (-2.2)   |
| 6          | 46.7 (26.6)       | 59.4 (5.9)    | 75.4 (-3.2)   |

  

| time (hrs) | <i>LDL</i> -PVV | <i>LLD</i> -PVV | <i>LDD</i> -PVV |
|------------|-----------------|-----------------|-----------------|
| 0          | 25.3 (0.2)      | 20.9 (1.2)      | 21.4 (0.6)      |
| 2          | 22.0 (2.5)      | 15.3 (10.7)     | 17.5 (2.3)      |
| 4          | 19.6 (4.5)      | 12.5 (17.5)     | 14.5 (4.4)      |
| 6          | 17.2 (6.4)      | 10.0 (23.2)     | 12.9 (6.6)      |

Initial and end point analysis of glyceraldehyde concentration (mM) and %*ee* (in parenthesis) for reactions with different *N*-terminal Proline peptide diastereomers.

## 4. Mechanistic studies

### 4.1 Monitoring the kinetic profile using $^{13}\text{C}$ -labeled material

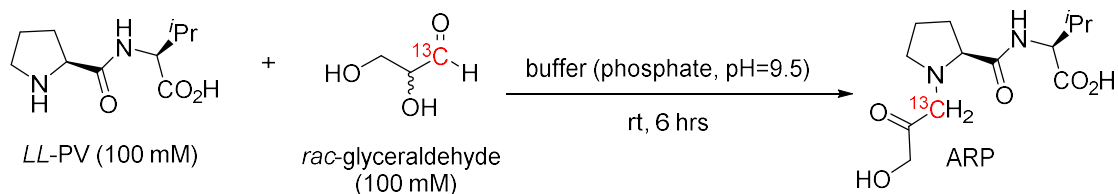

To a 900  $\mu\text{L}$  solution of  $^{13}\text{C}$ -labeled *D, L*-glyceraldehyde, *LL*-PV (21.4 mg, 1.0 mmol) and 100  $\mu\text{L}$  internal standard solution were added  $\text{Na}_2\text{HPO}_4 \cdot 7\text{H}_2\text{O}$  (96 mg) and  $\text{K}_3\text{PO}_4$  (4 mg) to buffer the mixture. The sample was submitted to quantitative  $^{13}\text{C}$  NMR analysis at fixed time points.

Stock solution of internal standard: sodium benzoate, 2.2 M in  $\text{D}_2\text{O}$ .

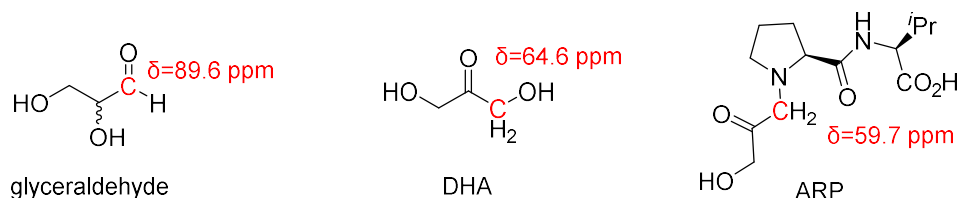

Figure 4. 1 chemical shift of carbons in different molecules

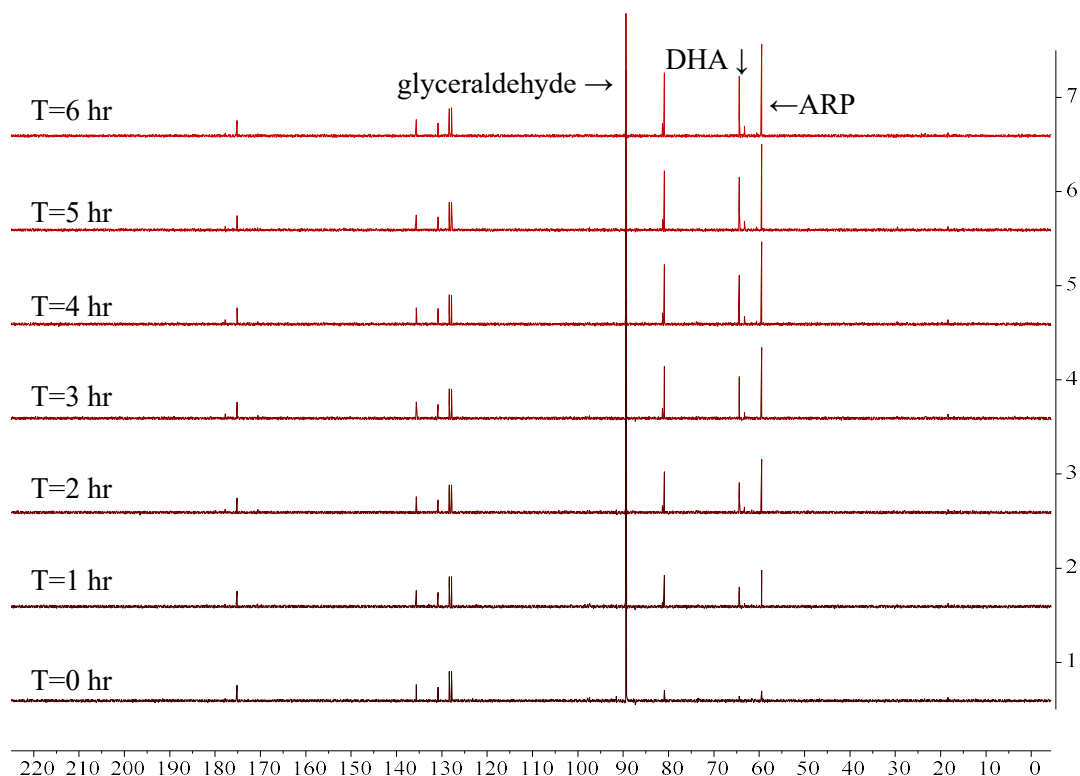

Figure 4. 2  $^{13}\text{C}$  spectra of reaction mixture overtime.

Table 4. 1 Changes of concentration of each component in the reaction mixture overtime.

| time (hrs) | glyceraldehyde (mM) | ARP (mM) | DHA (mM) | glyceraldehyde +ARP+DHA (mM) |
|------------|---------------------|----------|----------|------------------------------|
| 0          | 93.28               | 3.02     | 0.81     | 97.11                        |
| 1          | 84.21               | 10.06    | 3.15     | 97.42                        |
| 2          | 77.86               | 15.42    | 4.95     | 98.23                        |
| 3          | 72.16               | 19.26    | 6.56     | 97.98                        |
| 4          | 65.41               | 22.68    | 7.62     | 95.71                        |
| 5          | 59.40               | 24.59    | 8.72     | 92.71                        |
| 6          | 55.03               | 26.12    | 9.72     | 90.87                        |

## 4.2 Independent Reactions with *D*- and *L*-glyceraldehyde

### 4.2.1 Reaction protocol

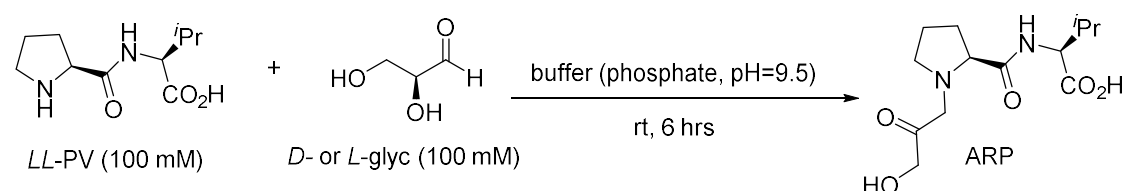

LL-PV (21.4 mg, 1 mmol) was reacted separately with *L*-/*D*-glyceraldehyde (9.0 mg, 1.0 mmol). To each reaction, 800  $\mu$ L phosphate buffer (pH=9.5, 4 M) and 200  $\mu$ L stock solution of DNB-Ala were added. The two reactions were let to stand at room temperature for 6 hrs. Aliquots were removed at fixed time points.

Stock solution of internal standard: DNB-Ala, 80.8 mM in phosphate buffer (pH=9.5, 4 M).

### 4.2.2 Measurement of concentrations of glyceraldehyde and DHA

The concentration of remaining glyceraldehyde was measured by DNPH derivatization protocol combined with LC-MS analysis as described in section 2. The concentration of DHA was measured by PMP derivatization protocol and analyzed by corresponding LC-MS method.

Table 4. 2 concentrations of glyceraldehyde and DHA in separated reactions

| time (hrs) | [ <i>L</i> -glyceraldehyde] (mM) | [ <i>D</i> -glyceraldehyde] (mM) | [DHA <sub>L</sub> ] (mM)* | [DHA <sub>D</sub> ] (mM)* |
|------------|----------------------------------|----------------------------------|---------------------------|---------------------------|
| 0          | 96.12                            | 93.04                            | 2.39                      | 1.75                      |
| 1          | 80.08                            | 87.05                            | 4.65                      | 3.67                      |
| 2          | 66.27                            | 81.67                            | 6.80                      | 5.73                      |
| 3          | 57.01                            | 74.96                            | 8.79                      | 7.31                      |
| 4          | 49.39                            | 70.05                            | 10.69                     | 8.55                      |
| 5          | 43.22                            | 64.04                            | 12.45                     | 9.64                      |
| 6          | 38.64                            | 60.24                            | 13.54                     | 10.46                     |

\* DHA<sub>L</sub>/DHA<sub>D</sub>: DHA generated from *L*/*D*-glyceraldehyde.

### 4.2.3 Estimation of ARP Concentration in Independent *D-/L*-Glyceraldehyde Reactions

ARP could be derivatized by DNPH and ARP-DNPH could be detected by LC-UV (@254 nm) using the same analyzing protocol of glyceraldehyde (See section 2). Unfortunately, we were not able to obtain a standard of ARP for calibration. However, the concentration of ARP could be estimated as follows:

In a reaction of *LL*-PV and  $^{13}\text{C}$ -rac-glyceraldehyde (see section 4.1), concentrations of ARP could be measured by quantitative  $^{13}\text{C}$  NMR. By submitting the aliquots to DMPH derivatization and HPLC analysis, the correlation between UV absorption areas of ARP-DMPH and corresponding concentrations (known from NMR) could be developed.

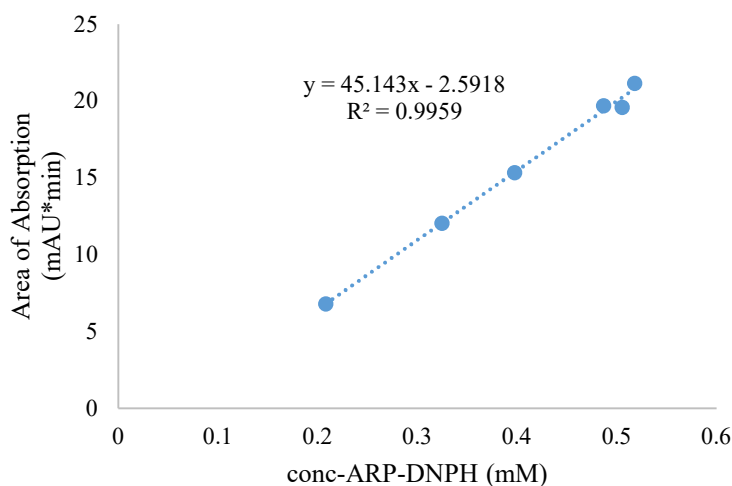

Figure 4. 3 Calibration curve of ARP-DNPH

Table 4. 3 Concentrations of ARP in separated reactions.

| time<br>(hrs) | [ARP <sub>L</sub> ]*<br>(mM) | [ARP <sub>D</sub> ]*<br>(mM) |
|---------------|------------------------------|------------------------------|
| 0             | 6.04                         | 0.00                         |
| 1             | 15.17                        | 4.95                         |
| 2             | 21.79                        | 9.05                         |
| 3             | 26.26                        | 12.26                        |
| 4             | 29.90                        | 15.46                        |
| 5             | 32.44                        | 16.74                        |
| 6             | 34.66                        | 17.58                        |

\* ARP<sub>L</sub>/ARP<sub>D</sub>: ARP generated from L/D-glyceraldehyde.

#### 4.2.4 Determination of Mass Balance

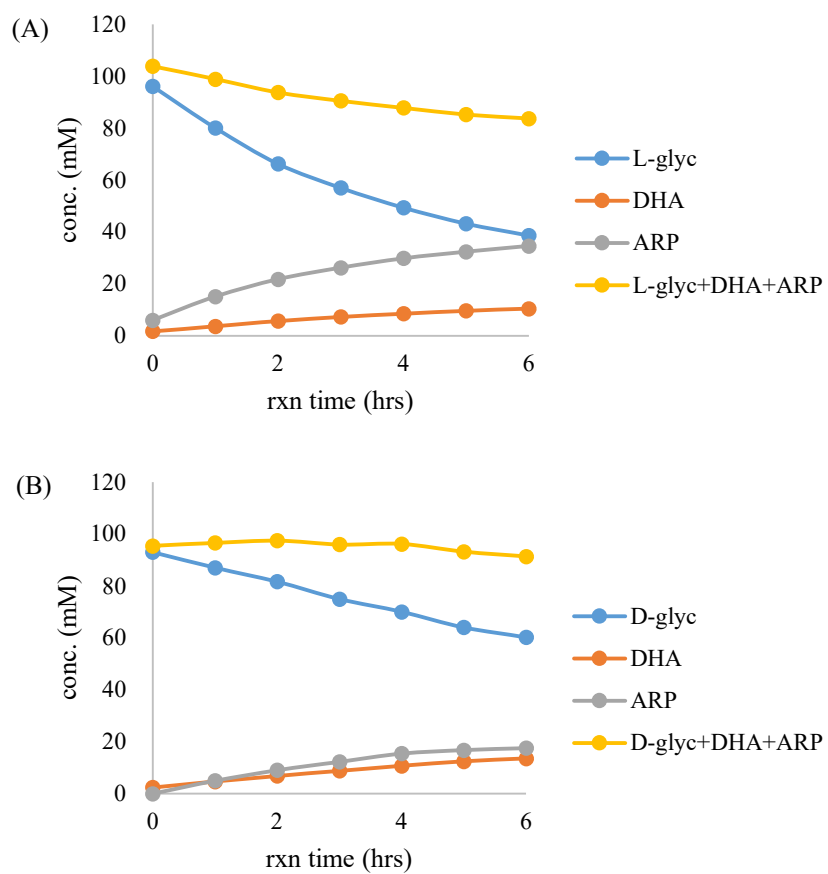

Figure 4. 4 Concentrations of reaction components and mass balance (yellow) in separated reactions.

### 4.3 Control experiment with *DD*-PV

*DD*-PV was reacted with *rac*-glyceraldehyde under the optimized conditions. Equal and opposite e.e. was achieved compared to the reaction with *LL*-PV and *rac*-glyceraldehyde.

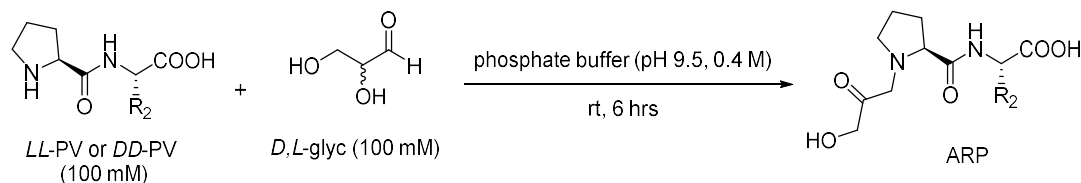

Table 4. 4 Time course of the kinetic resolution by *LL*-PV and *DD*-PV.

| time (hrs) | <i>LL</i> -PV |        | <i>DD</i> -PV |        |
|------------|---------------|--------|---------------|--------|
|            | conc. (mM)    | ee (%) | conc. (mM)    | ee (%) |
| 0          | 98.3          | 0.3    | 106.6         | -0.0   |
| 1          | 80.9          | 5.8    | 94.6          | -3.1   |
| 2          | 69.8          | 10.7   | 85.6          | -6.4   |
| 3          | 61.8          | 14.6   | 77.6          | -8.8   |
| 4          | 54.4          | 18.3   | 71.2          | -11.0  |
| 5          | 49.6          | 21.3   | 65.6          | -13.5  |
| 6          | 44.9          | 24.0   |               |        |

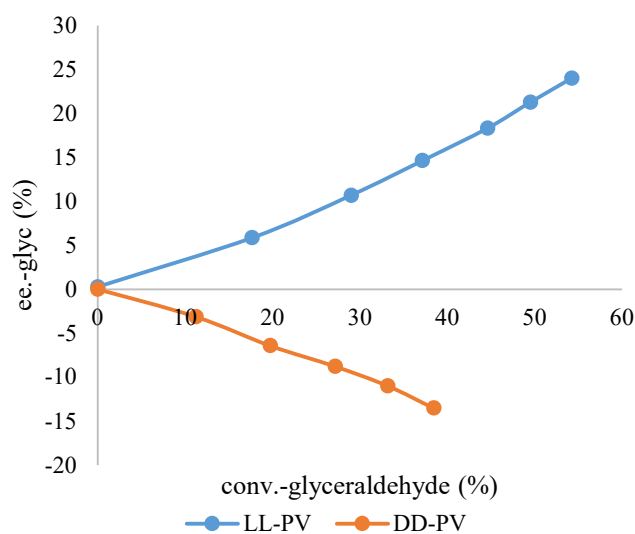

Figure 4. 5 Enantiomeric excess as a function of % conversion of *rac*-glyceraldehyde mediated by *LL*-/*DD*-PV

## 5. Solid Phase enrichment of *LL*-PV from *LL*/*DL*-PV mixtures

### *Measurement of saturation concentration of LL-PV and DL-PV*

2 mL of peptide solution was subjected to a nitrogen flow. Aliquots (200  $\mu$ L) were removed upon observation of peptide precipitation and filtered. The filtrate (80  $\mu$ L) was dissolved in D<sub>2</sub>O (320  $\mu$ L) and sodium benzoate solution (80  $\mu$ L, 203 mM in D<sub>2</sub>O). The mixture was analyzed by quantitative <sup>1</sup>H NMR.

*Peptide solution:* Equal amount of *LL*-PV (100 mM) and *DL*-PV (100 mM) were dissolved in deuterated phosphate buffer (pH=9.5, 4 M).

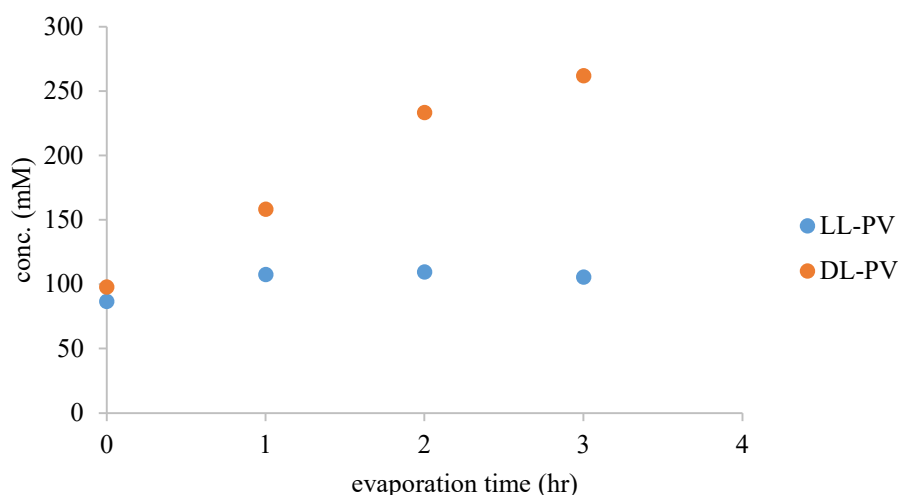

Figure 5. 1 Concentration of *LL*-PV and *DL*-PV in solution phase as the sample evaporated.

The saturation concentration of *LL*-PV was found to be around 100~110 mM, while saturation concentration of *DL*-PV was higher than 250 mM.

### *Solid phase enrichment of LL-PV*

4 mL peptide solution was subjected to a nitrogen flow and evaporated to around 2 mL. The remaining suspension was then filtered. The solid was washed with D<sub>2</sub>O. Quantitative <sup>1</sup>H NMR analysis indicated a 20:1 ratio of *LL*-PV to *DL*-PV in precipitation.

*Peptide solution:* Equal amount of *LL*-PV (100 mM) and *DL*-PV (100 mM) were dissolved in deuterated phosphate buffer (pH=9.5, 4 M).



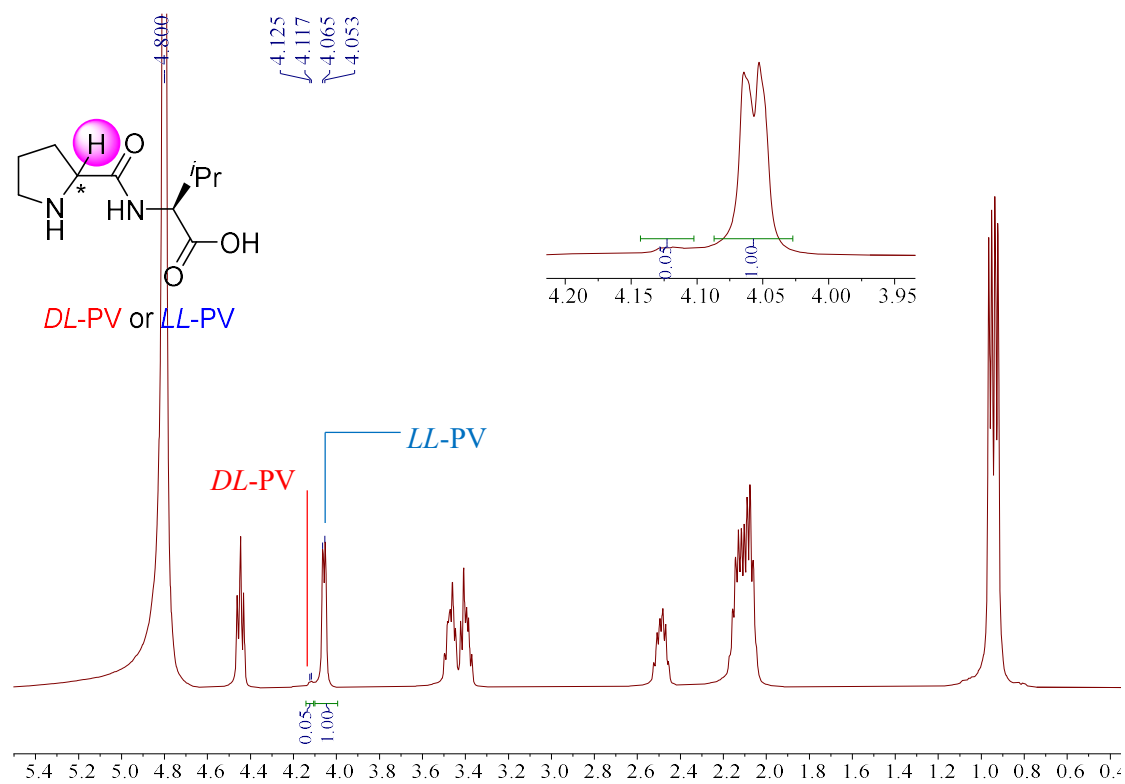

Figure 5. 2 Components of the precipitant in saturated solution.

## 6. Characterization of Amadori Rearrangement Product

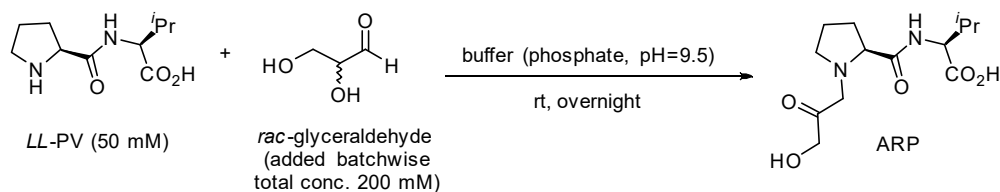

The Amadori Rearrangement Product (ARP) was prepared by reacting *LL*-PV with *rac*-glyceraldehyde and was characterized directly in the reaction mixture.

*LL*-PV (53 mg, 2.5 mmol) and *rac*-glyceraldehyde (45 mg, 5.0 mmol) were dissolved in a mixture of phosphate buffer (pH=9.5, 4.0 M, 4.5 mL) and D<sub>2</sub>O (0.5 mL). The solution was let to stand at room temperature for 6 hrs. Another batch of *rac*-glyceraldehyde (45 mg, 5.0 mmol) was added as solid into the solution, dissolved and reacted overnight under room temperature.

The reaction mixture was submitted to HRMS and NMR analysis.

HRMS:

Calculated [ARP+H]<sup>+</sup>: 287.1607

Found [ARP+H]<sup>+</sup>: 287.1611

Crude NMR analysis:

NMR spectra were recorded on Bruker AMX-500 instrument. The <sup>1</sup>H NMR spectrum was referenced by H<sub>2</sub>O and <sup>13</sup>C NMR spectrum by remaining glyceraldehyde (δ 89.6 for carbonyl carbon).

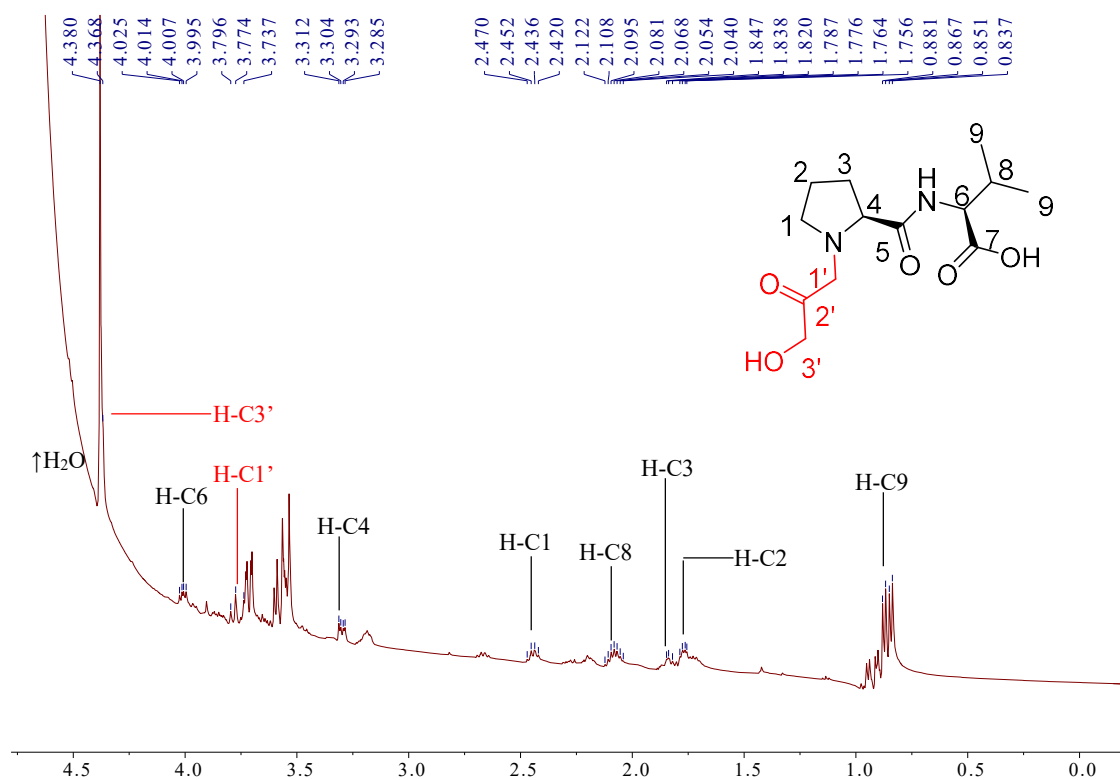

Figure 6. 1  $^1\text{H}$  NMR of reaction mixture and assignment of ARP peaks

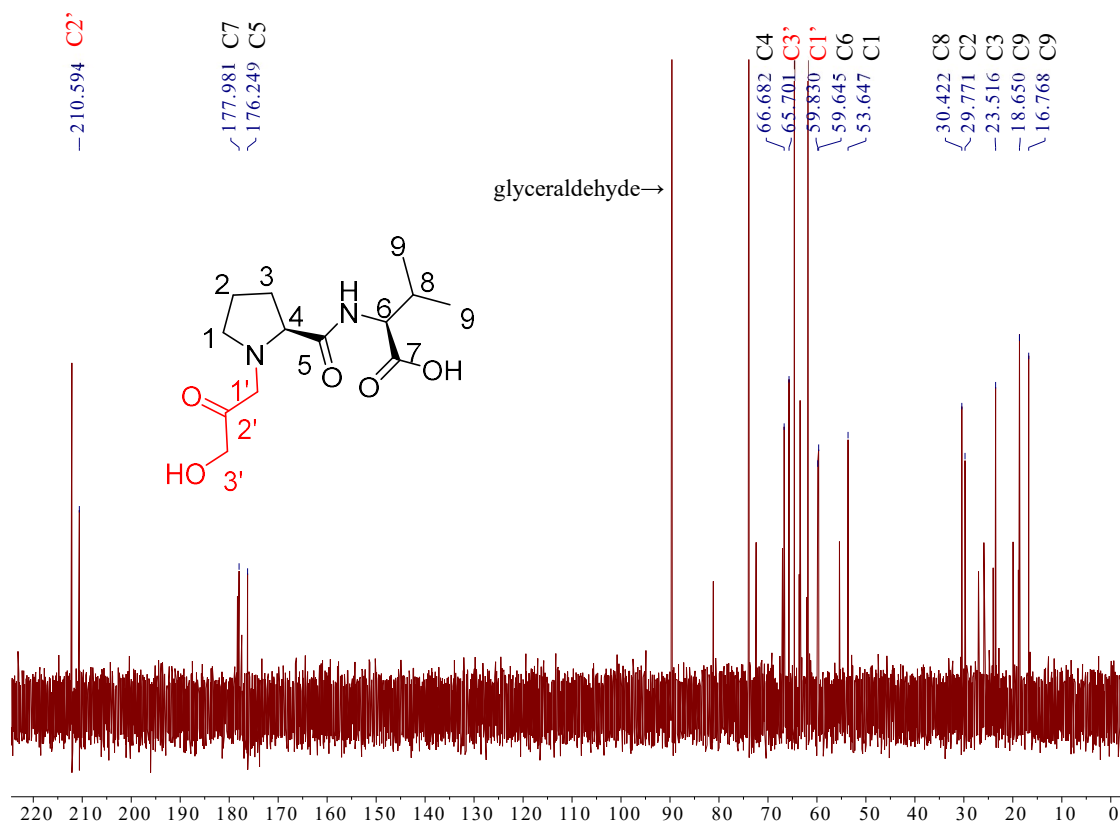

Figure 6. 2  $^{13}\text{C}$  NMR of reaction mixture and assignment of ARP peaks

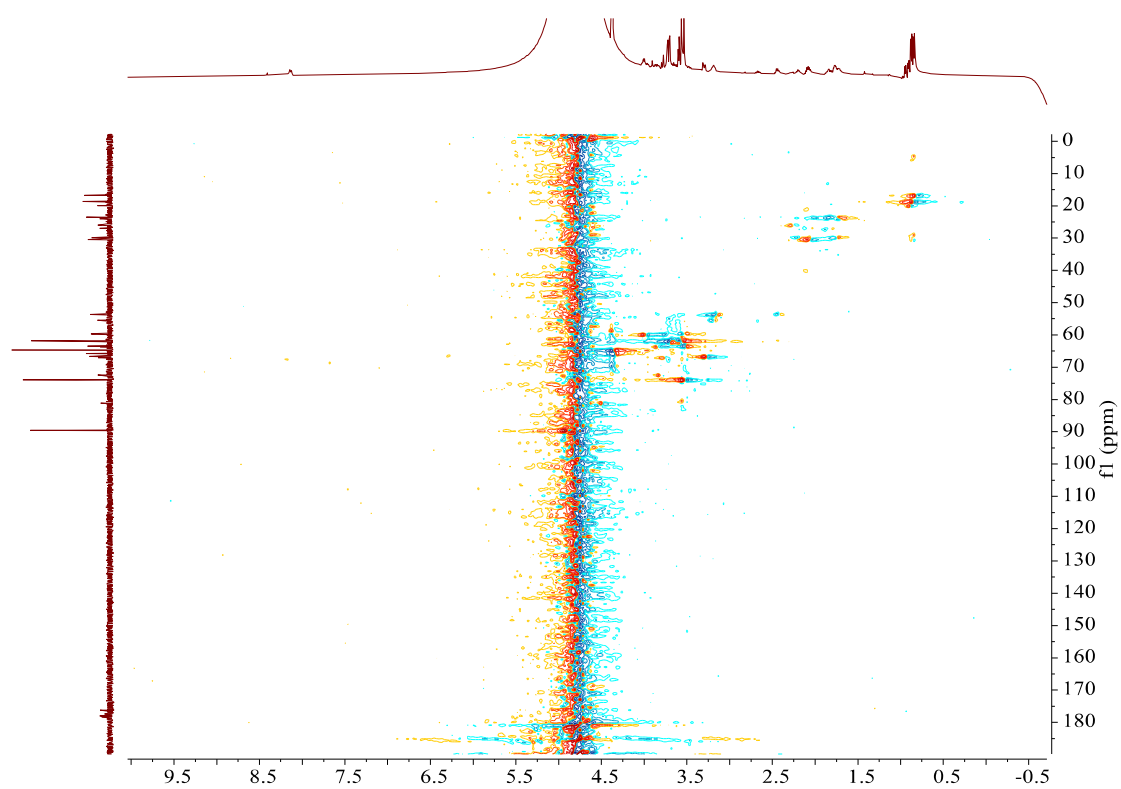

Figure 6.3  $^1\text{H}$ - $^{13}\text{C}$  HSQC of reaction mixture

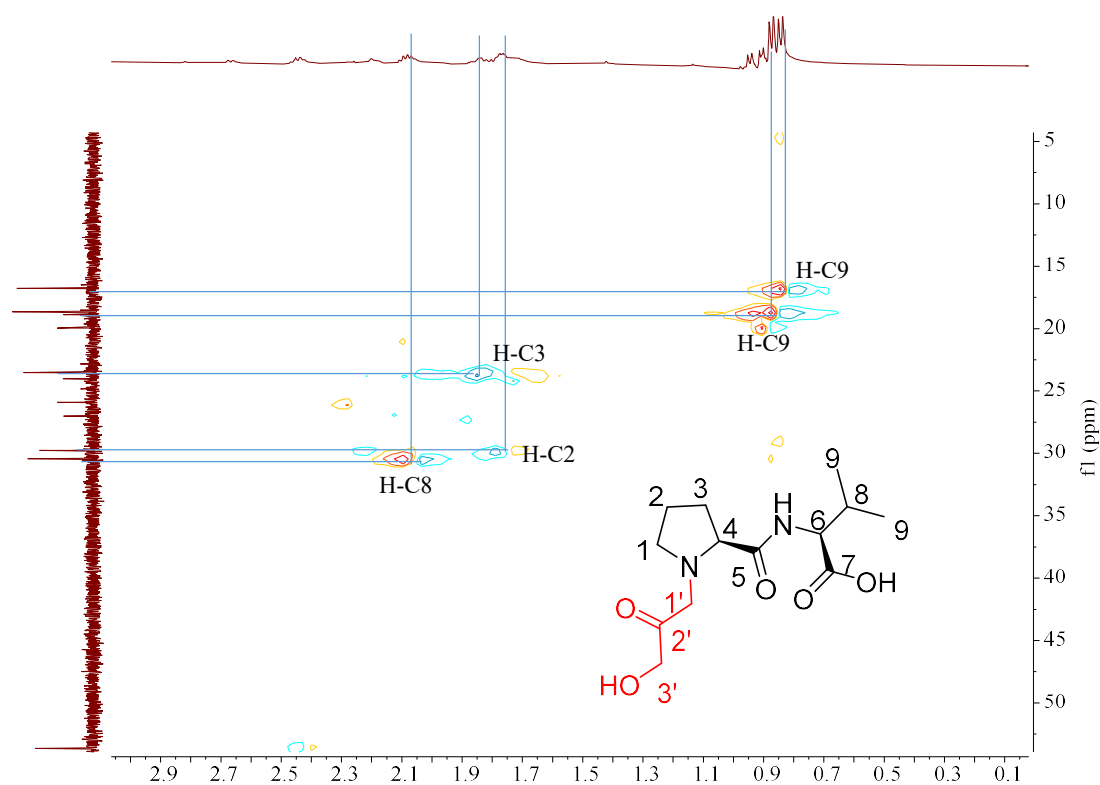

Figure 6.4 HSQC signals of ARP

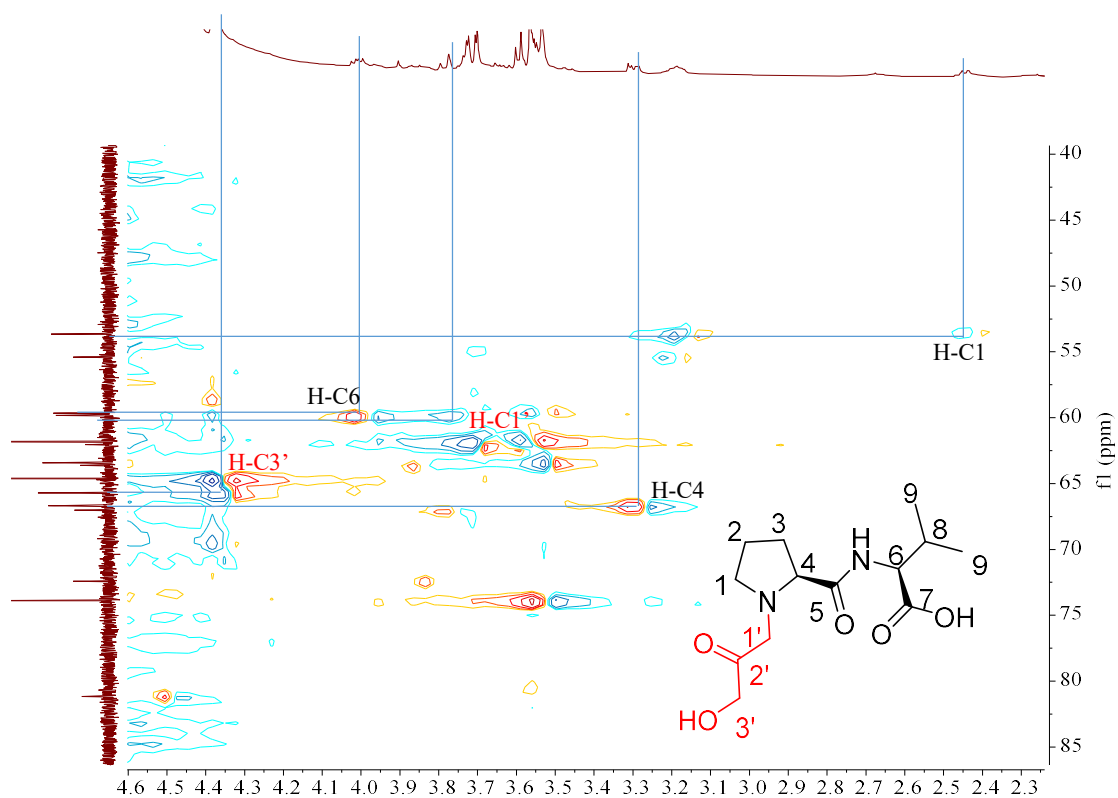

Figure 6. 5 HSQC signals of ARP

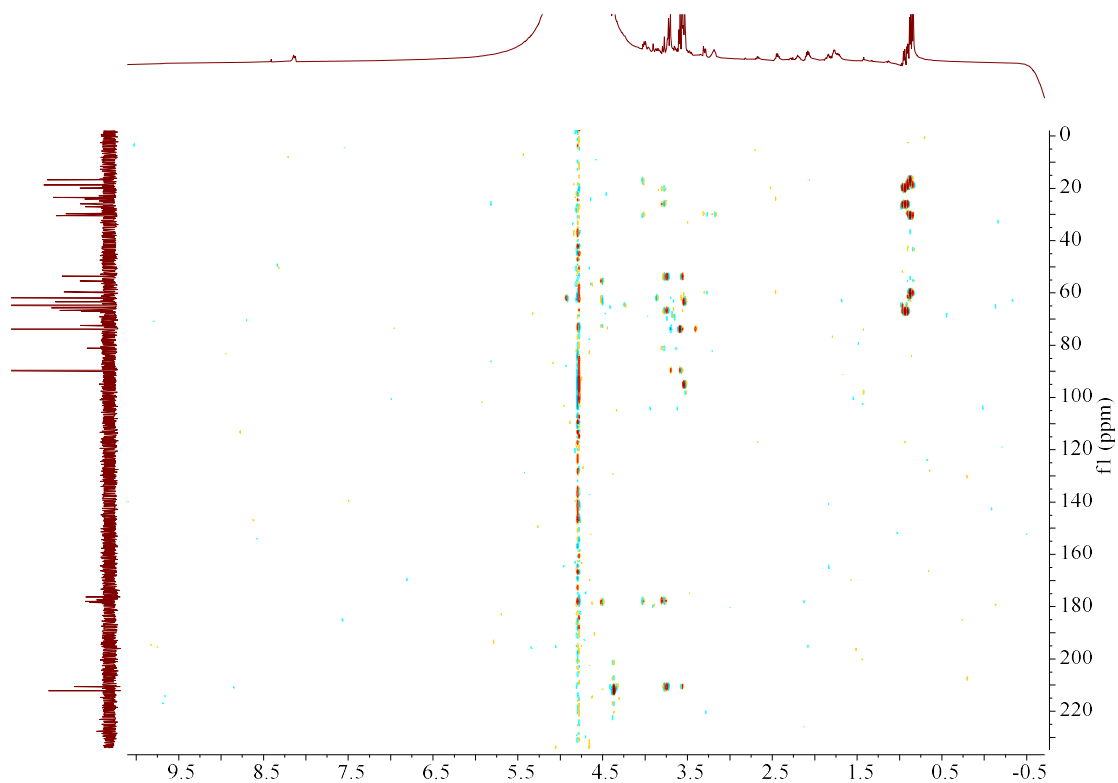

Figure 6. 6  $^1\text{H}$ - $^{13}\text{C}$  HMBC of reaction mixture

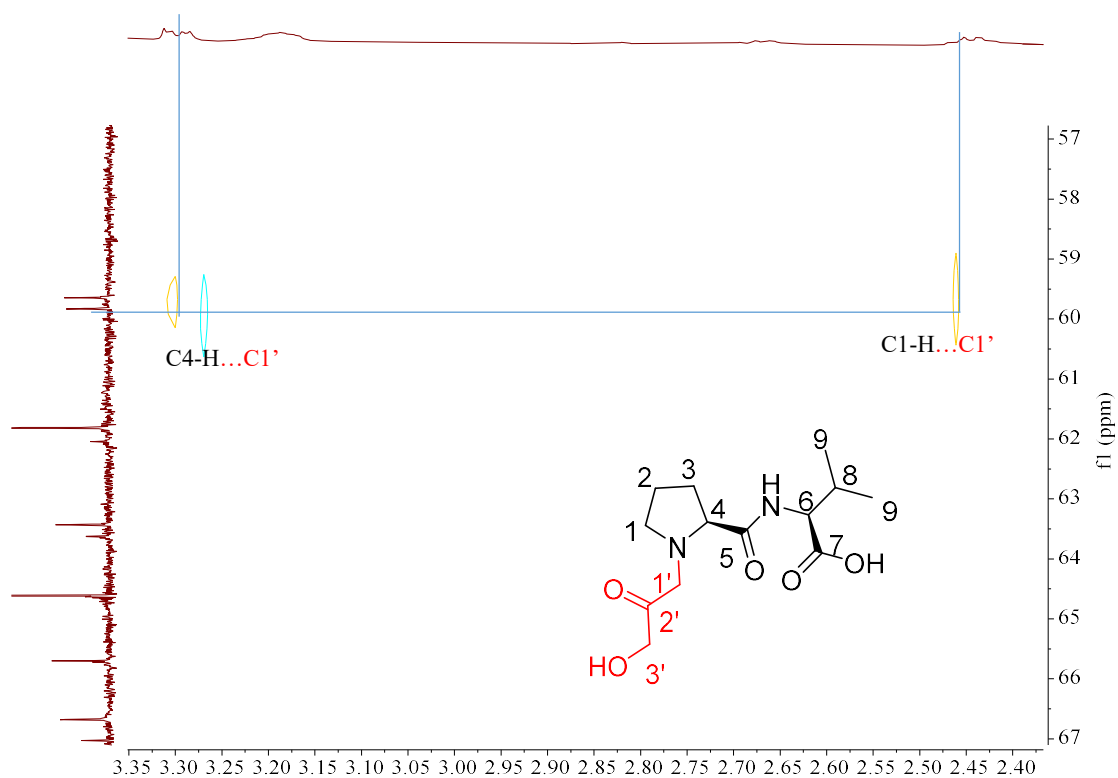

Figure 6. 7 HMBC signals of ARP

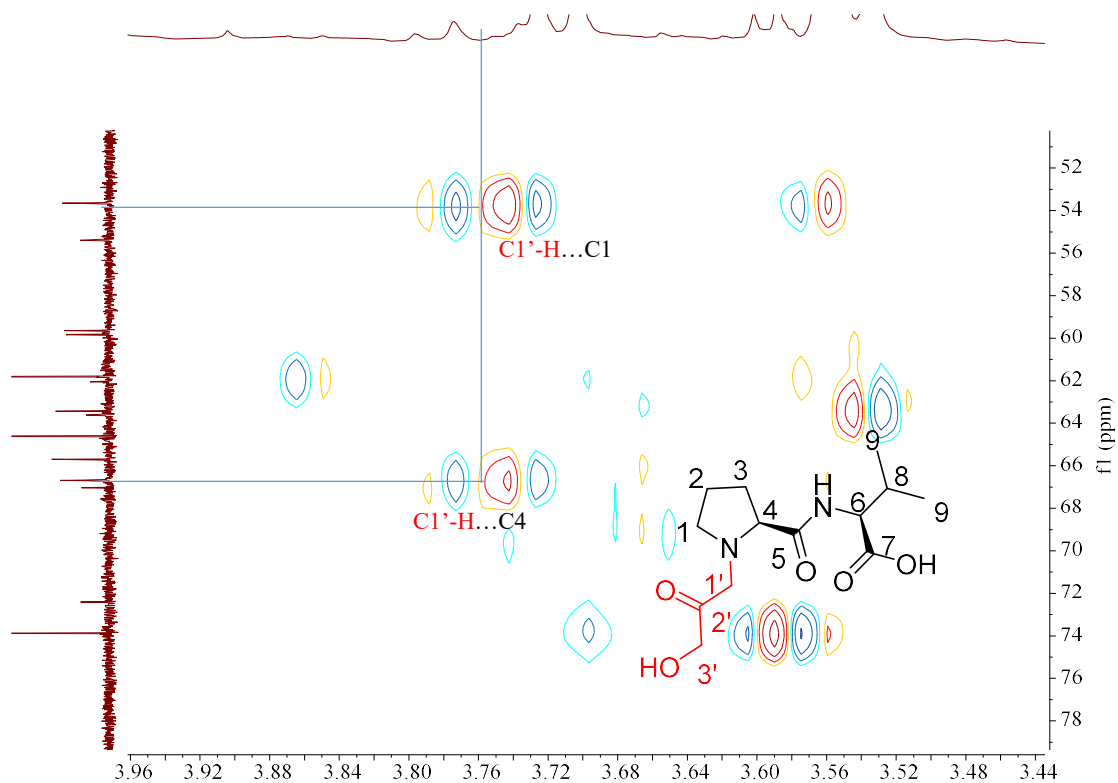

Figure 6. 8 HMBC signals of reaction ARP

## 7. Preparation of peptides

### 7.1 Synthesis of peptides

Peptides that were not commercially available were synthesized by an automated solid-phase synthesizer.

#### **LLL-PVV**

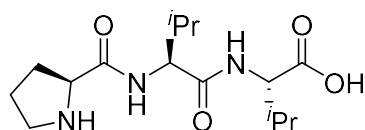

$^1\text{H NMR}$  (600 MHz,  $\text{D}_2\text{O}$ )  $\delta$  4.47 (dd,  $J = 8.2, 5.8$  Hz, 1H), 4.19 (d,  $J = 7.8$  Hz, 1H), 4.08 (d,  $J = 6.2$  Hz, 1H), 3.44 (ddt,  $J = 38.8, 12.1, 6.8$  Hz, 2H), 2.54 – 2.44 (m, 1H), 2.16 – 1.99 (m, 5H), 1.04 – 0.95 (m, 6H), 0.92 (dd,  $J = 12.1, 6.8$  Hz, 6H).

$^{13}\text{C NMR}$  (150 MHz,  $\text{D}_2\text{O}$ )  $\delta$  172.0, 169.1, 59.9, 59.1, 46.1, 30.2, 29.4, 29.4, 23.20, 18.3, 17.9, 17.3, 17.0.

#### **LLD-PVV**

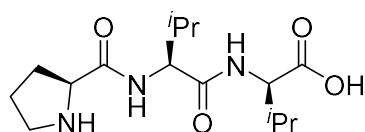

$^1\text{H NMR}$  (600 MHz,  $\text{D}_2\text{O}$ )  $\delta$  4.51 – 4.45 (m, 1H), 4.28 (d,  $J = 6.9$  Hz, 1H), 4.10 (d,  $J = 5.5$  Hz, 1H), 3.50 – 3.38 (m, 2H), 2.49 (dd,  $J = 8.3, 6.2$  Hz, 1H), 2.20 – 2.01 (m, 5H), 1.09 – 0.83 (m, 12H).

$^{13}\text{C NMR}$  (150 MHz,  $\text{D}_2\text{O}$ )  $\delta$  177.8, 172.0, 169.1, 60.3, 59.6, 59.1, 46.0, 30.1, 29.8, 29.4, 23.2, 18.5, 18.1, 16.9, 16.9.

#### **LDL-PVV**

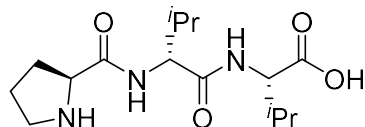

$^1\text{H NMR}$  (600 MHz,  $\text{D}_2\text{O}$ )  $\delta$  4.49 – 4.42 (m, 1H), 4.34 (d,  $J = 7.1$  Hz, 1H), 4.08 (d,  $J = 5.9$  Hz, 1H), 3.52 – 3.37 (m, 2H), 2.52 (td,  $J = 8.8, 8.1, 5.4$  Hz, 1H), 2.20 – 2.02 (m, 5H), 0.96 (ddd,  $J = 20.3, 16.4, 6.8$  Hz, 12H).

$^{13}\text{C NMR}$  (150 MHz,  $\text{D}_2\text{O}$ )  $\delta$  177.7, 172.0, 169.2, 60.5, 59.3, 59.0, 46.1, 30.1, 29.8, 29.6, 23.3, 18.5, 18.1, 17.0, 16.7.

**LDD-PVV**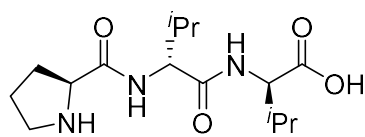

**<sup>1</sup>H NMR** (600 MHz, D<sub>2</sub>O) δ 4.49 – 4.43 (m, 1H), 4.25 (d, J = 7.2 Hz, 1H), 4.09 (d, J = 6.3 Hz, 1H), 3.51 – 3.39 (m, 2H), 2.57 – 2.47 (m, 1H), 2.22 – 2.02 (m, 5H), 0.98 (dd, J = 6.4, 3.9 Hz, 6H), 0.93 (dd, J = 12.7, 7.0 Hz, 6H).

**<sup>13</sup>C NMR** (150 MHz, D<sub>2</sub>O) δ 177.5, 172.2, 169.3, 60.4, 59.5, 59.3, 46.0, 30.1, 29.7, 29.6, 23.3, 18.3, 18.0, 17.0, 16.9.

**LLLL-PVVV**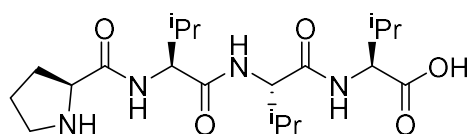

**<sup>1</sup>H NMR** (600 MHz, D<sub>2</sub>O) δ 4.49 – 4.43 (m, 1H), 4.18 (t, J = 8.6 Hz, 2H), 4.09 (dd, J = 6.2, 2.1 Hz, 1H), 3.49 – 3.38 (m, 2H), 2.49 (q, J = 6.9, 6.4 Hz, 1H), 2.15 – 1.98 (m, 6H), 1.01 – 0.87 (m, 18H).

**<sup>13</sup>C NMR** (150 MHz, D<sub>2</sub>O) δ 177.0, 172.5, 172.1, 169.0, 60.0, 59.6, 59.2, 59.0, 46.1, 29.4, 29.7, 29.5, 29.4, 23.2, 18.2, 17.9, 17.4, 17.0.

**LLLL-PVfV**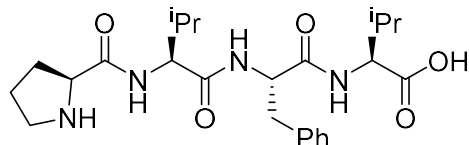

**<sup>1</sup>H NMR** (600 MHz, D<sub>2</sub>O) δ 7.36 (t, J = 7.5 Hz, 2H), 7.30 (t, J = 8.4 Hz, 3H), 4.43 – 4.35 (m, 1H), 4.09 (dd, J = 15.5, 7.1 Hz, 2H), 3.42 (q, J = 7.1 Hz, 2H), 3.20 (dd, J = 13.9, 5.9 Hz, 1H), 2.99 (dd, J = 13.9, 9.3 Hz, 1H), 2.39 (dq, J = 14.5, 7.3 Hz, 1H), 2.13 – 1.94 (m, 4H), 1.83 (dq, J = 14.0, 7.1 Hz, 1H), 0.95 – 0.83 (m, 12H).

**<sup>13</sup>C NMR** (150 MHz, D<sub>2</sub>O) δ 176.8, 172.1, 171.5, 168.7, 136.0, 128.7, 128.2, 126.5, 59.9, 59.3, 58.9, 54.3, 46.1, 36.6, 30.2, 29.7, 29.4, 23.3, 18.0, 17.9, 17.3, 16.9.



**LLLL-PFVV**

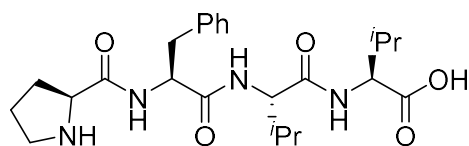

$^1\text{H NMR}$  (600 MHz,  $\text{D}_2\text{O}$ )  $\delta$  7.38 (t,  $J = 7.5$  Hz, 2H), 7.33 (t,  $J = 7.4$  Hz, 1H), 7.28 (d,  $J = 6.8$  Hz, 2H), 4.73 (t,  $J = 7.7$  Hz, 1H), 4.38 – 4.32 (m, 1H), 4.14 (d,  $J = 8.4$  Hz, 1H), 4.05 (d,  $J = 6.3$  Hz, 1H), 3.47 – 3.34 (m, 2H), 3.15 (dd,  $J = 13.9, 7.2$  Hz, 1H), 3.05 (dd,  $J = 13.9, 8.2$  Hz, 1H), 2.49 – 2.40 (m, 1H), 2.06 (ddq,  $J = 45.7, 13.6, 6.9$  Hz, 5H), 0.94 (ddd,  $J = 16.6, 6.8, 2.5$  Hz, 12H).

$^{13}\text{C NMR}$  (150 MHz,  $\text{D}_2\text{O}$ )  $\delta$  176.6, 171.8, 171.8, 168.7, 135.5, 128.6, 128.3, 126.8, 59.7, 59.0, 58.9, 54.8, 46.0, 36.4, 30.1, 29.8, 23.2, 18.1, 17.8, 17.4, 17.2.

## 7.2 NMR spectra for new peptides

### LLL-PVV

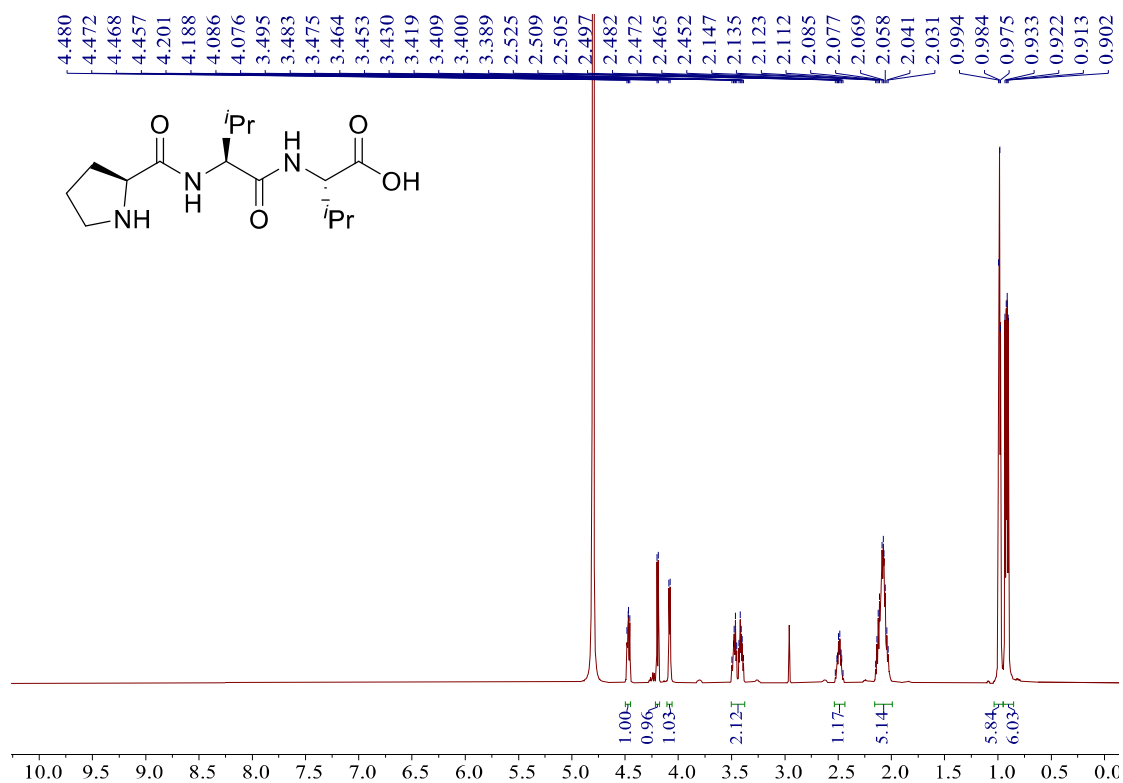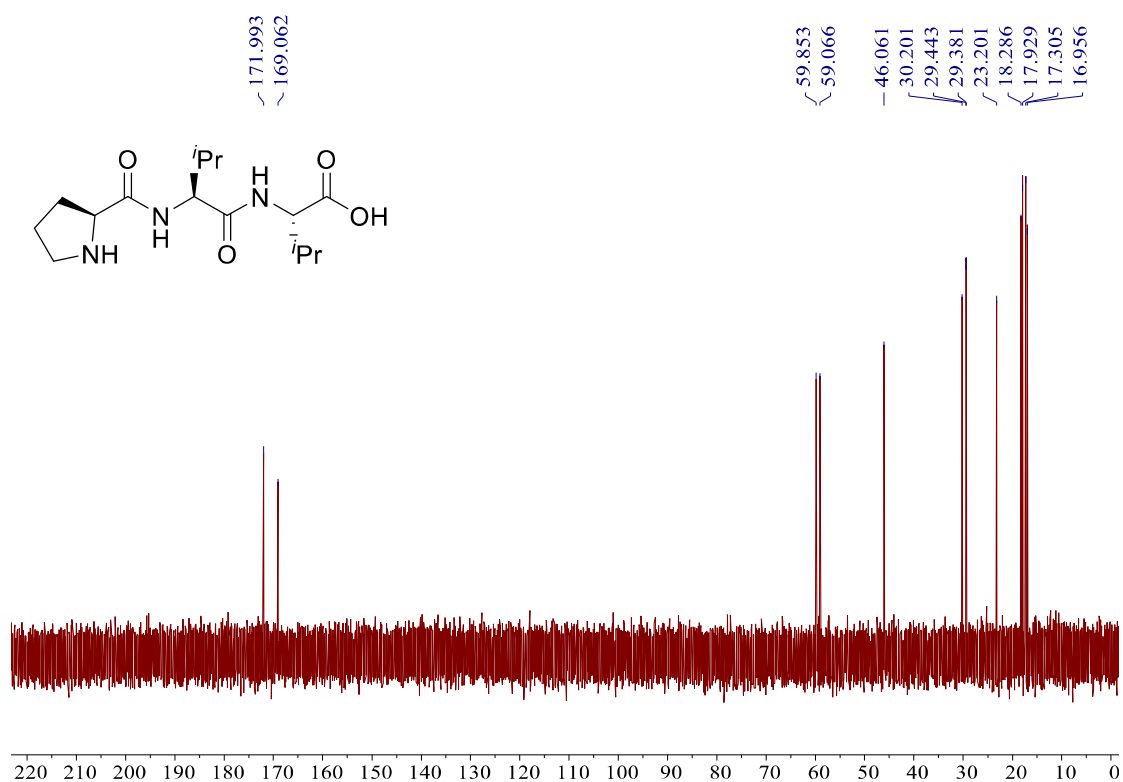

# **LLD-PVV**

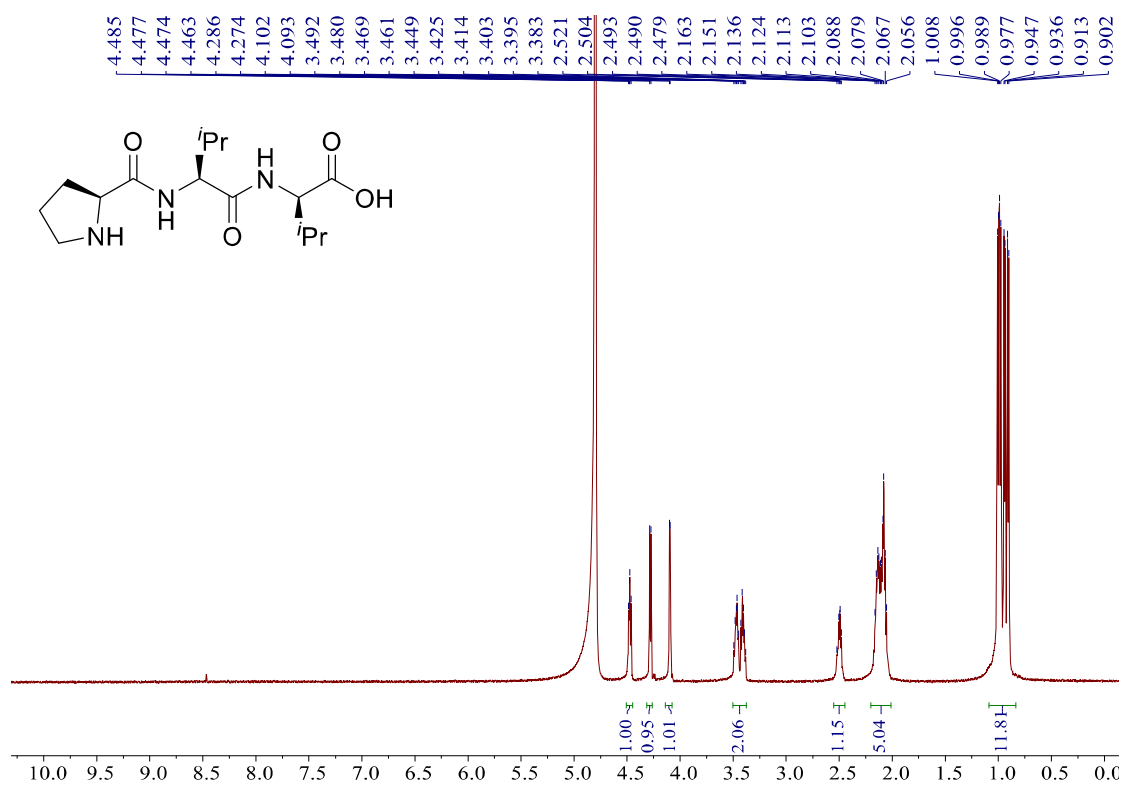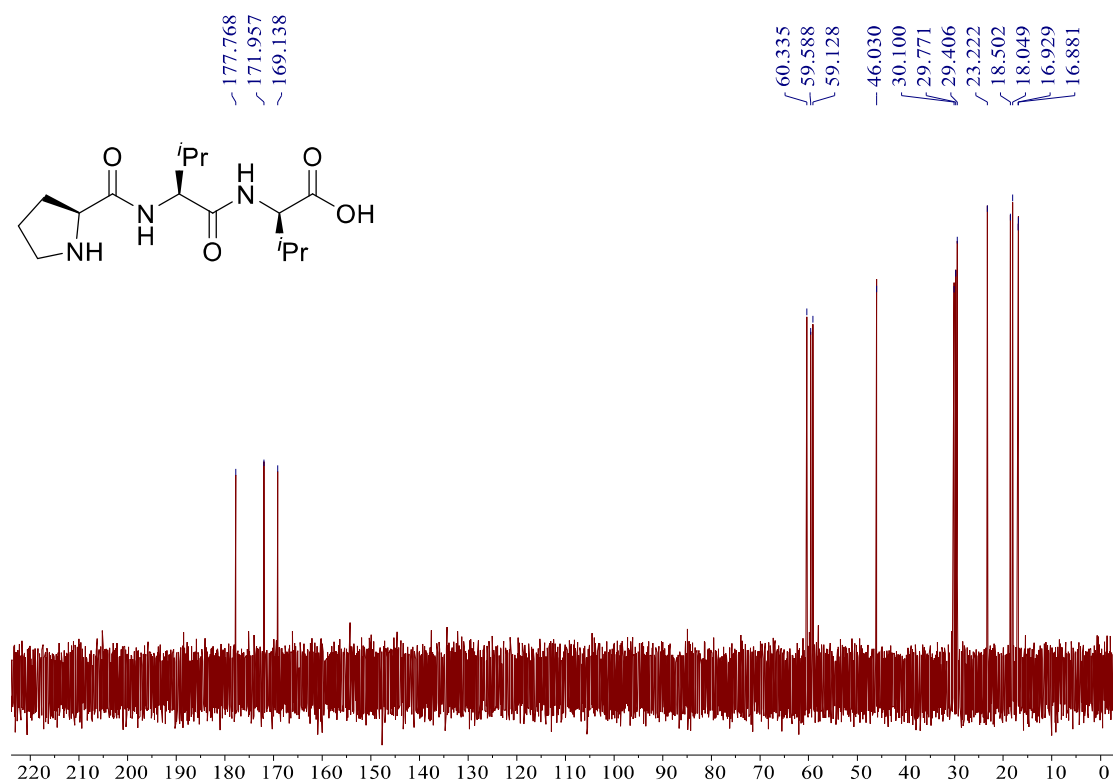

# **LDL-PVV**

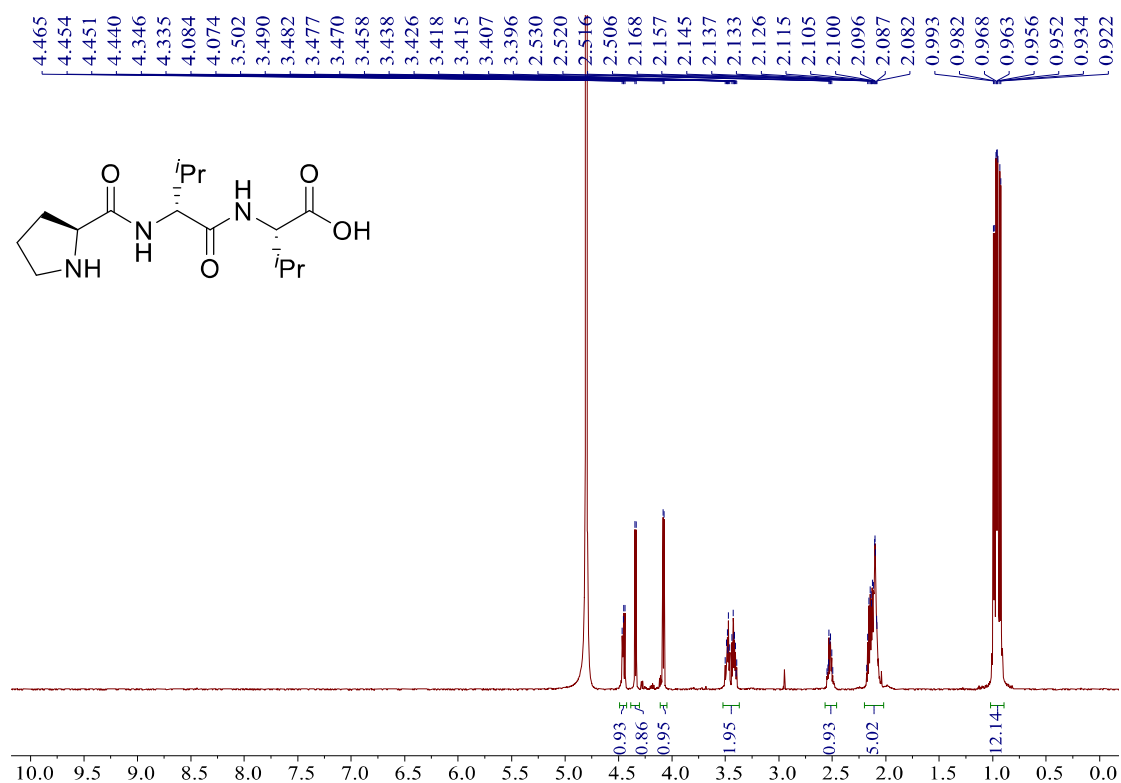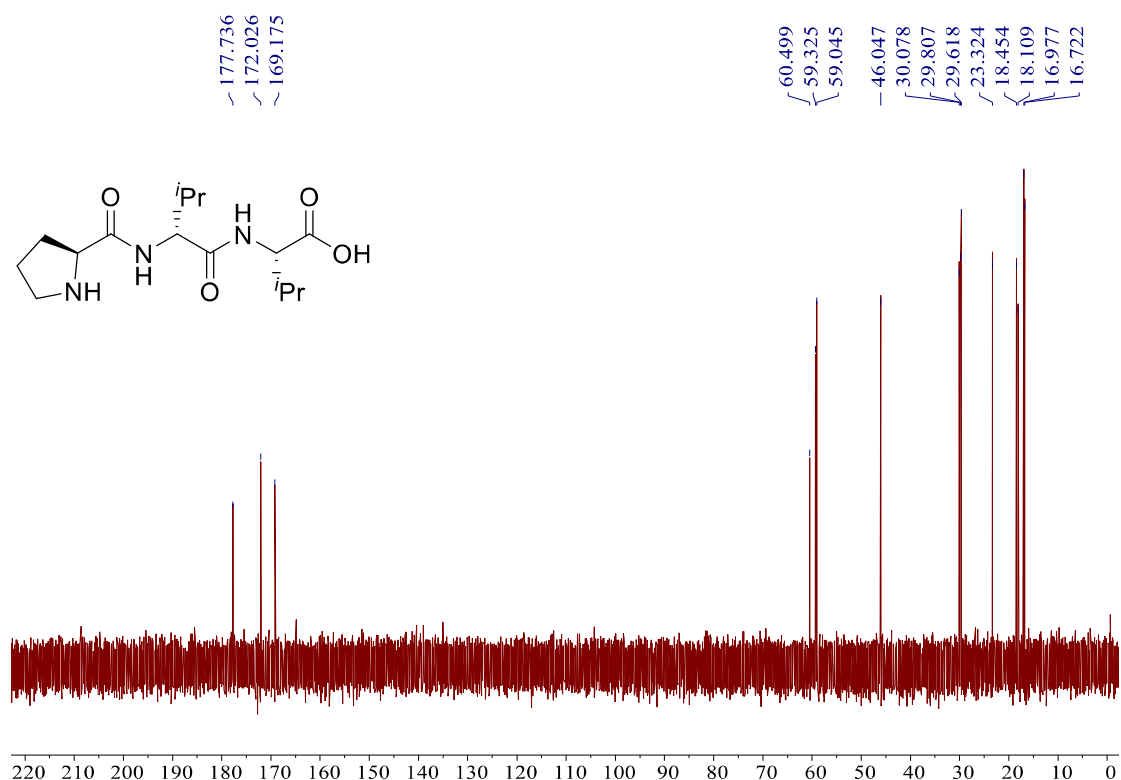

# **LDD-PVV**

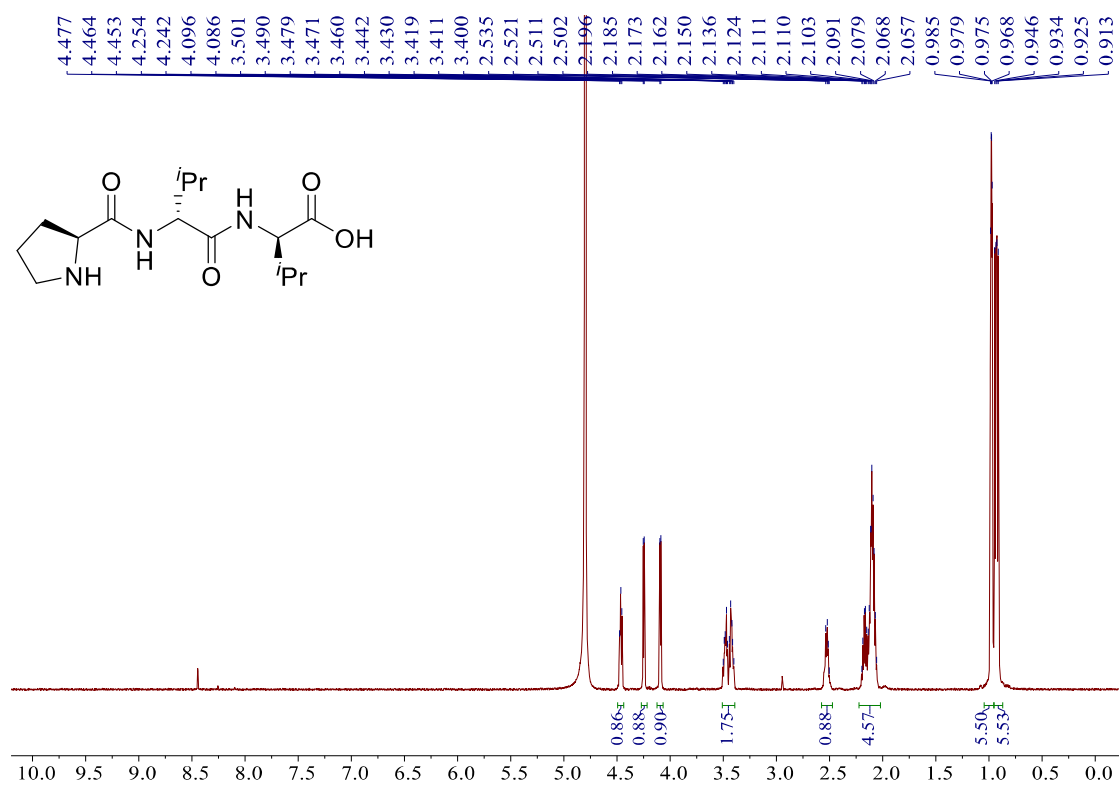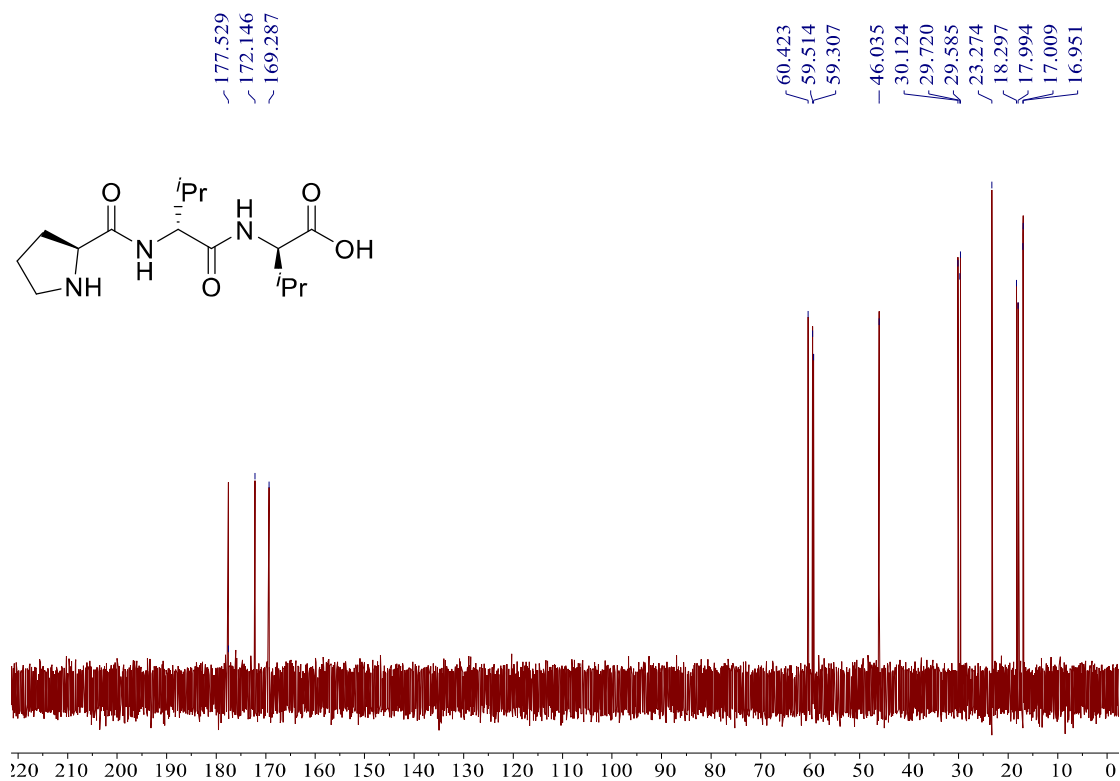

# **LLLL-PVVV**

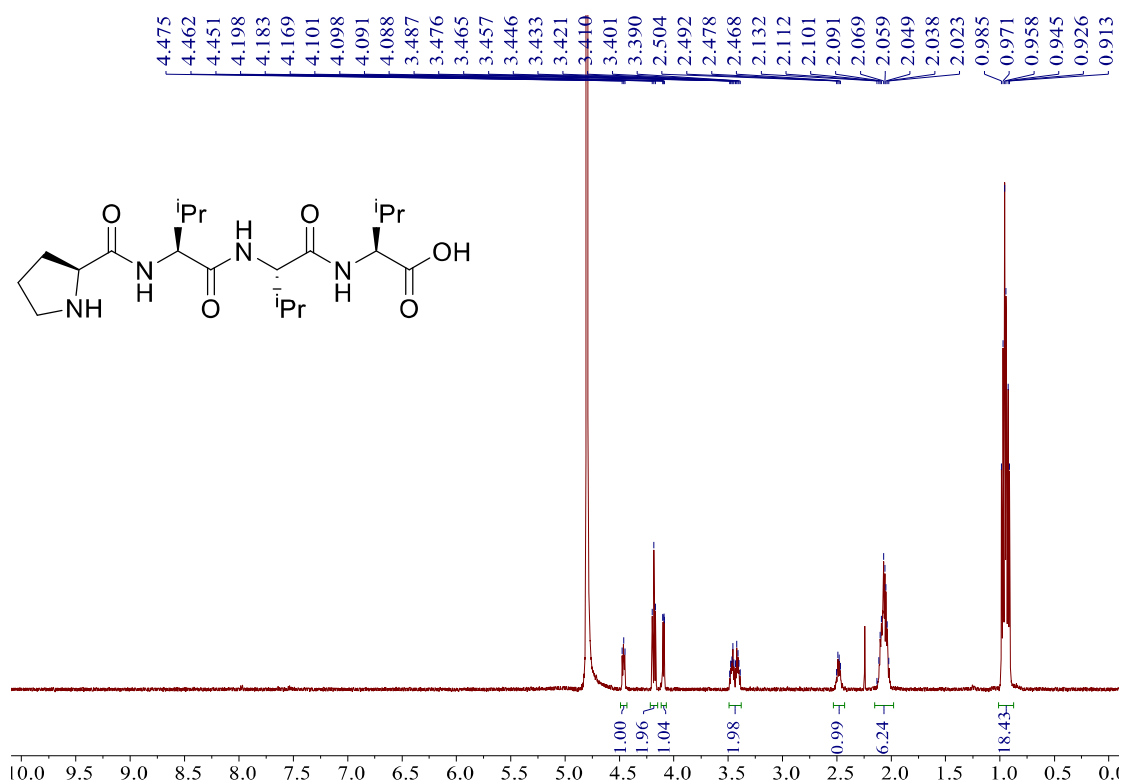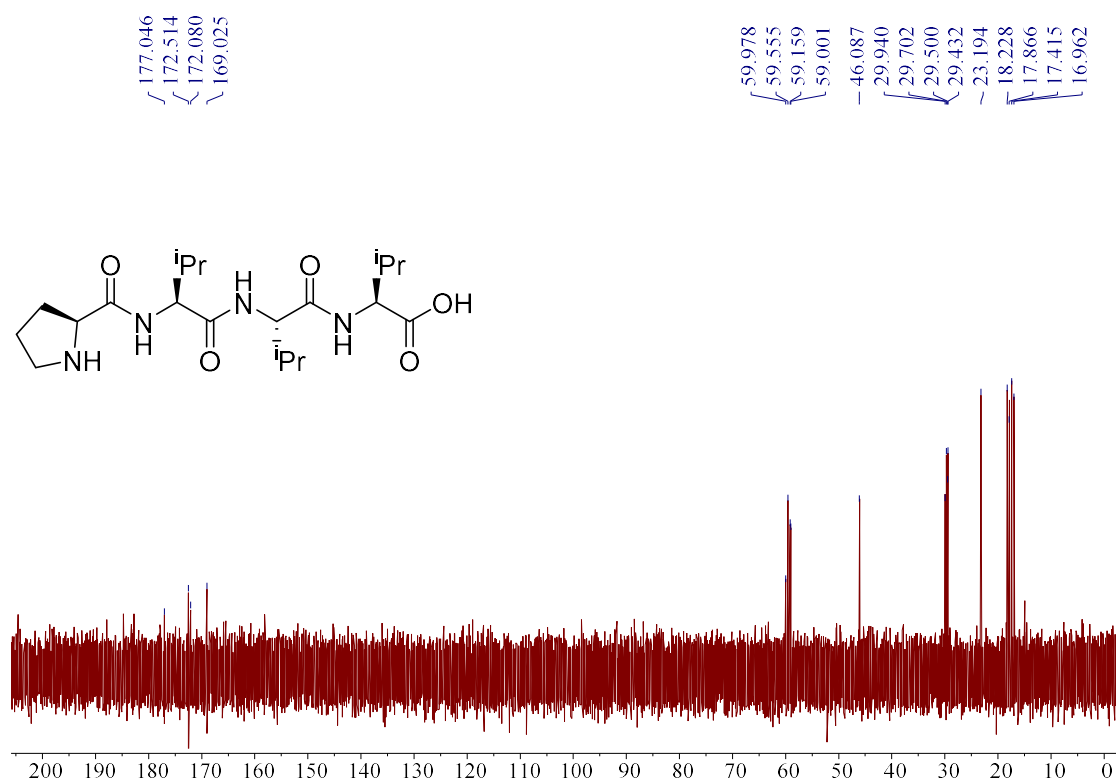

# **LLLL-PVFV**

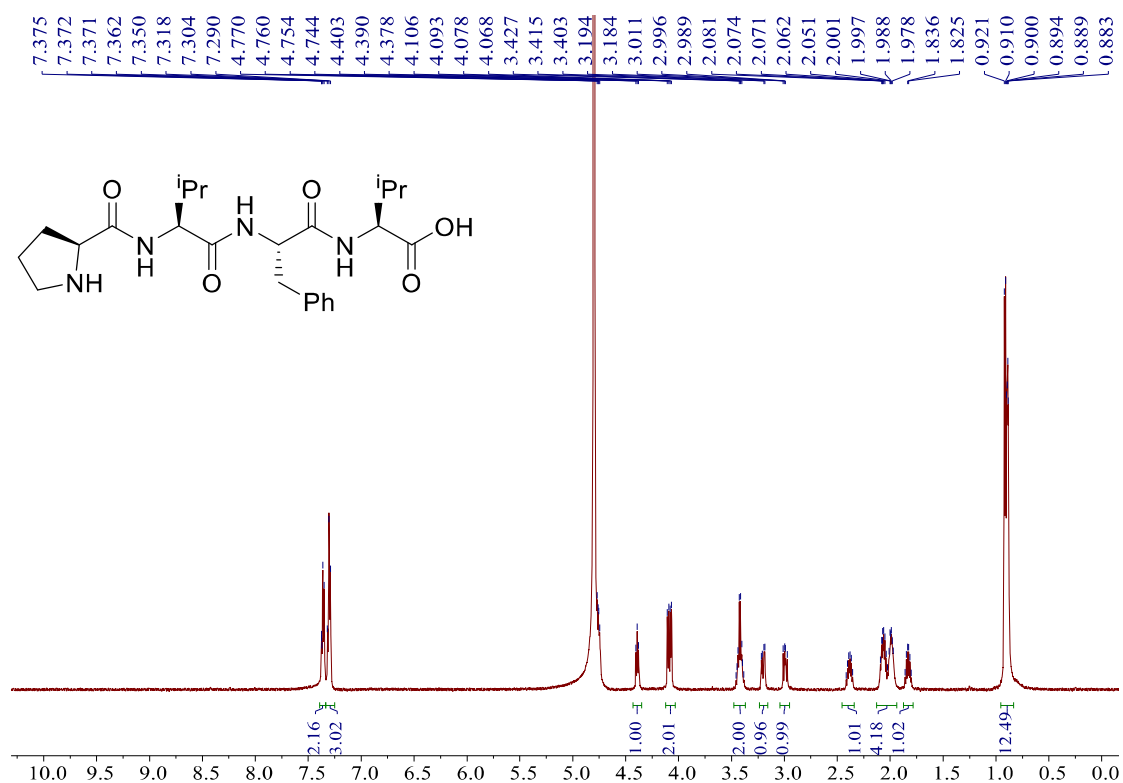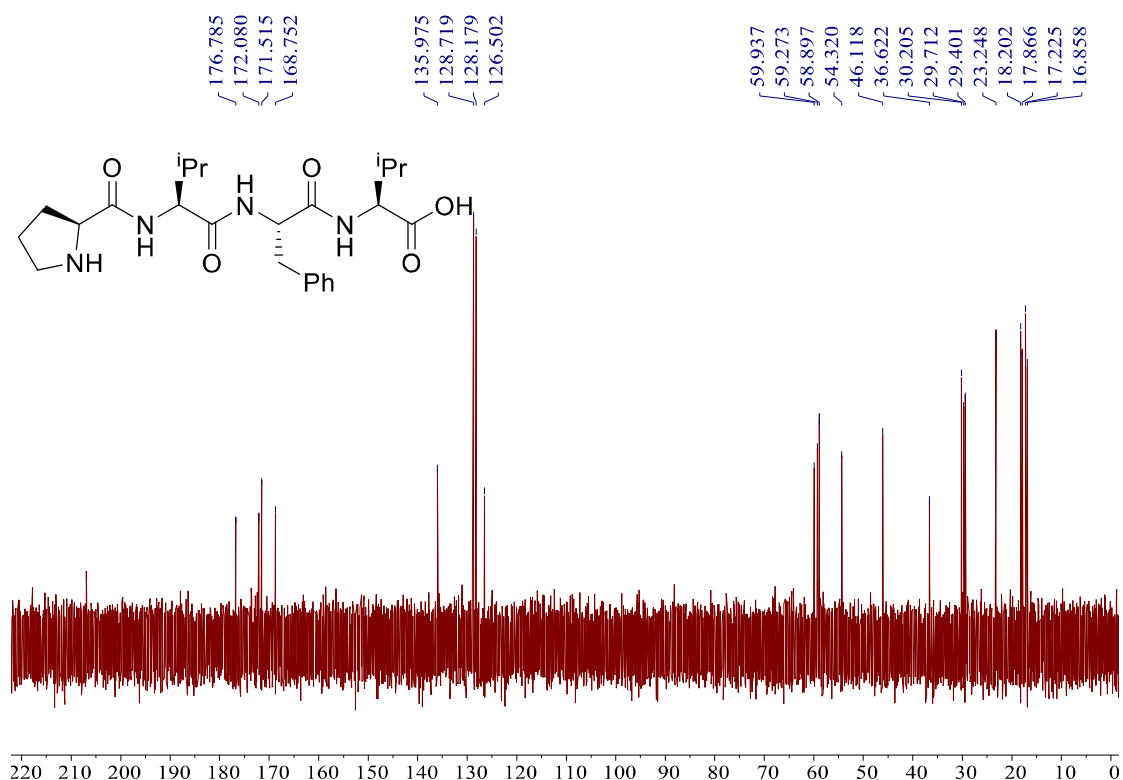

# **LLLL-PFVV**

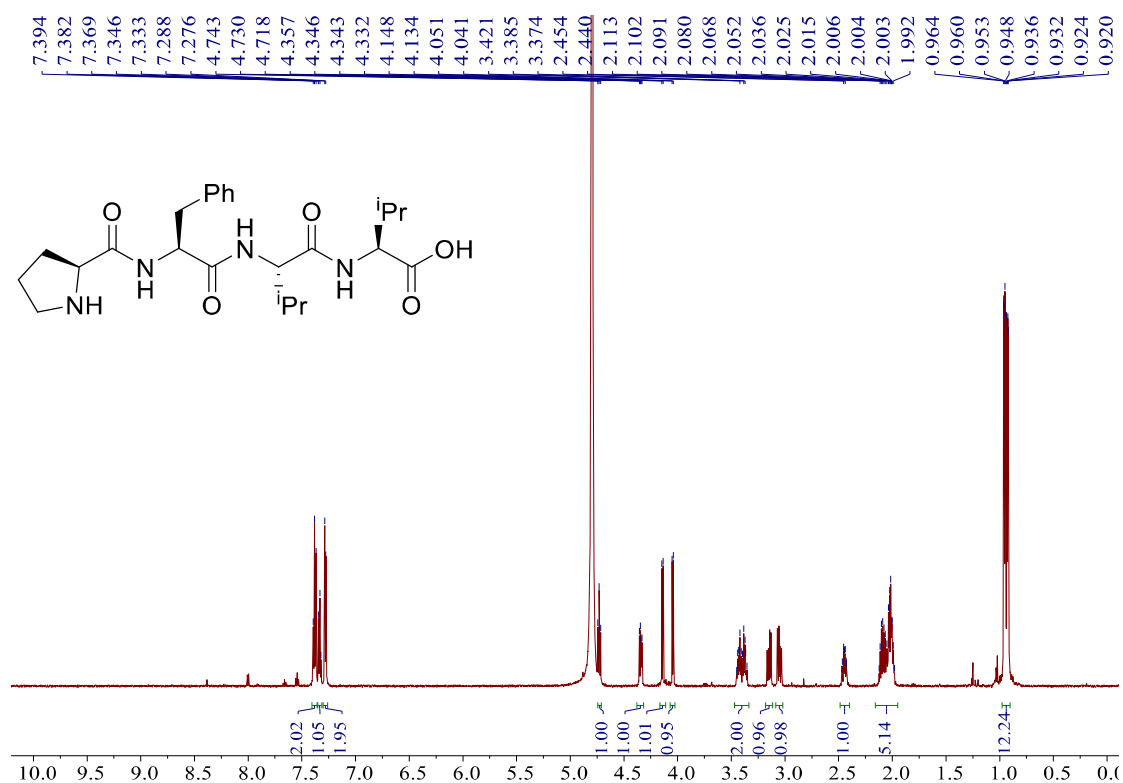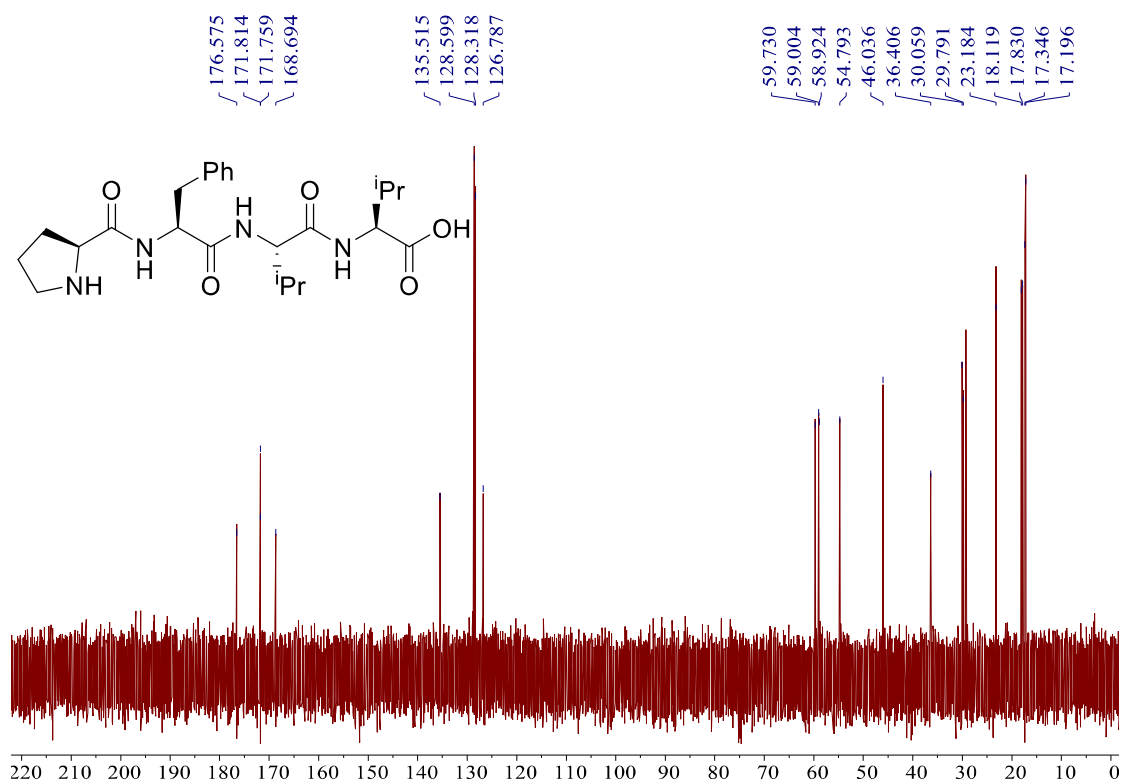

Supplement: d1sc01250a1.pdf [file d1sc01250a1.pdf]
